# Supplementary material for: A novel coupling reaction of α-halo ketones promoted by SmI3/CuI
Source: Royal Society of Chemistry journal article supplement (doi:10.1039/c5ra26604a), 2016-01-01

## A novel coupling reaction of $\alpha$ -halo ketones promoted by $\text{SmI}_3/\text{CuI}$

Yongjun Liu,\* Hengmin Zhao, Guang Tian, Feng Du, Yan Qi, Yonghong Wen

### Experimental

#### General

All NMR spectra were measured in  $\text{CDCl}_3$  and recorded on Bruker Avance-500 (500 MHz) spectrometer with TMS as the internal standard. Chemical shifts are expressed in ppm and  $J$  values are given in Hz. IR spectra were recorded on a Bruker Tensor-27 spectrometer. Melting points are uncorrected. All the reactions in this paper were performed under nitrogen atmosphere. Before use, DMF was pre-dried over molecule sieve, and THF was refluxed and redistilled over sodium.

#### Typical procedure for the preparation of 2-hydroxy-1,4-diphenylbutane-1,4-dione (**2a**)

To a mixture of Sm powder (0.3 g, 2 mmol) in anhydrous DMF (10 mL) under a nitrogen atmosphere,  $\text{I}_2$  (0.8 g, 3.2 mmol) was added at room temperature with magnetic stirring, and a dark brown solution of triiodide samarium was afforded in 2 h. Cuprous iodide (0.02 g, 0.1 mmol) and 2-bromoacetophenone (0.4 g, 2 mmol) were added and the mixture was then heated to 105 °C. After completion of the reaction (about 2 h, monitored by TLC), dilute hydrochloric acid (2 M, 5 mL) was added and the resulting mixture was extracted with ethyl acetate ( $3 \times 10$  mL). The combined organic layer was washed with brine and saturated sodium thiosulfate solution, dried over anhydrous sodium sulfate, and concentrated under reduced pressure. The crude product was purified with flash chromatography (silica/hexane - ethyl acetate 5 : 1 v/v) to afford 0.18 g of **2a** with 71% yield.

#### Typical procedure for the preparation of 1,4-diphenylbutane-1,4-dione(**3a**)

To a mixture of Sm powder (0.3 g, 2 mmol) in anhydrous THF (10 mL) under a nitrogen

atmosphere, I<sub>2</sub> (0.8 g, 3.2 mmol) was added at room temperature with magnetic stirring, and a yellow solution of triiodide samarium was afforded in 2 h. Cuprous iodide (0.02 g, 0.1 mmol) and 2-bromoacetophenone (0.4 g, 2 mmol) were added and the mixture was refluxed. After completion of the reaction (about 2.5 h, monitored by TLC), dilute hydrochloric acid (2 M, 5 mL) was added and the resulting mixture was extracted with ethyl acetate (3 × 10 mL). The combined organic layer was washed with brine and saturated sodium thiosulfate solution, dried over anhydrous sodium sulfate, and concentrated under reduced pressure. The crude product was purified with flash chromatography (silica/hexane - ethyl acetate 5 : 1 v/v) to afford 0.17 g of **3a** with 73% yield.

**2-Hydroxy-1,4-diphenylbutane-1,4-dione (2a):**<sup>19a</sup> White solid: 0.19 g, 77% of yield; m.p. 90-92 °C (lit. 98°C)<sup>19a</sup> <sup>1</sup>H NMR (500 MHz, CDCl<sub>3</sub>) δ 3.37 (m, 2 H), 3.99 (s, 1 H), 5.66 (m, 1 H), 7.46 (m, 4 H), 7.57 (m, 2 H), 7.98 (m, 4 H); <sup>13</sup>C NMR (125 MHz, CDCl<sub>3</sub>) δ 200.7, 197.2, 136.8, 133.9, 133.7, 133.6, 128.9, 128.8, 128.7, 128.3, 70.2, 43.6; IR (KBr) ν 3432, 3055, 2900, 1678, 1596, 1580, 1446 cm<sup>-1</sup>; HRMS m/z calcd for C<sub>16</sub>H<sub>14</sub>O<sub>3</sub> [M + H]<sup>+</sup> 255.1021, found 255.1029.

**2-Hydroxy-1,4-di-p-tolyl-butane-1,4-dione (2b):** White solid: 0.17 g, 62% of yield.; m.p. 112-114 °C; <sup>1</sup>H NMR (500 MHz, CDCl<sub>3</sub>) δ 2.40 (s, 3 H), 2.45 (s, 3 H), 3.34 (m, 2 H), 3.99 (d, 1 H, *J* = 6.0 Hz), 5.67 (m, 1 H), 7.26 (m, 2 H), 7.30 (m, 2 H), 7.85 (m, 2 H), 7.90 (m, 2 H); <sup>13</sup>C NMR (125 MHz, CDCl<sub>3</sub>) δ 200.4, 196.8, 129.6, 129.4, 128.9, 128.5, 70.0, 43.7, 21.8, 21.7; IR (KBr) ν 3424, 2920, 2856, 1674, 1643, 1587, 1487 cm<sup>-1</sup>; HRMS m/z calcd for C<sub>18</sub>H<sub>18</sub>O<sub>3</sub> [M + H]<sup>+</sup> 283.1334, found 283.1342.

**1,4-Bis-(4-chloro-phenyl)-2-hydroxy-butane-1,4-dione (2c):** White solid: 0.23 g, 72% of yield; m.p. 156-158 °C; <sup>1</sup>H NMR (500 MHz, CDCl<sub>3</sub>) δ 3.35 (m, 2 H), 3.98 (s, 1 H), 5.54 (m, 1 H), 7.42 (m, 2 H), 7.46 (m, 2 H), 7.86 (m, 2 H), 7.93 (m, 2 H); <sup>13</sup>C NMR (125 MHz, CDCl<sub>3</sub>) δ 199.3, 196.3, 140.5, 140.3, 134.8, 132.0, 130.2, 129.8, 129.3, 129.1, 70.3, 43.1; IR (KBr) ν 3423, 2921, 2852, 1650, 1587, 1486, 1462 cm<sup>-1</sup>; HRMS m/z calcd for C<sub>16</sub>H<sub>12</sub>Cl<sub>2</sub>O<sub>3</sub> [M + H]<sup>+</sup> 323.0242, found 323.0251.

**1,4-Bis(4-bromo-phenyl)-2-hydroxy-butane-1,4-dione (2d):** White solid: 0.28 g, 67% of yield; m.p. 186-188 °C.; <sup>1</sup>H NMR (500 MHz, CDCl<sub>3</sub>) δ 3.38 (m, 2 H), 3.97 (d, 1 H, *J* = 6.5 Hz), 5.56 (m, 1 H), 7.63 (m, 2 H), 7.67 (m, 2 H), 7.82 (m, 2 H) 7.89 (m, 2 H); <sup>13</sup>C NMR (125 MHz, CDCl<sub>3</sub>) δ 200.4, 196.8, 145.0, 144.5, 134.4, 131.1, 129.6, 129.4, 128.9, 128.5, 70.0, 43.7; IR (KBr) ν 3420, 2977, 2925, 1674, 1648, 1586, 1541 cm<sup>-1</sup>; HRMS m/z calcd for C<sub>16</sub>H<sub>12</sub>Br<sub>2</sub>O<sub>3</sub> [M + H]<sup>+</sup> 410.9231, found 410.9231.

**1,4-Bis(4-fluoro-phenyl)-2-hydroxy-butane-1,4-dione (2e):** White solid: 0.21 g, 71% of yield; m.p. 140-142 °C; <sup>1</sup>H NMR (500 MHz, CDCl<sub>3</sub>) δ 3.38 (m, 2 H), 4.01 (d, 1 H, *J* = 6.5 Hz), 5.59 (m, 1 H), 7.18 (m, 4 H), 7.99 (m, 2 H), 8.07 (m, 2 H); <sup>13</sup>C NMR (125 MHz, CDCl<sub>3</sub>) δ 198.9, 196.0, 167.2, 165.1, 133.1, 131.7, 131.6, 131.1, 130.1, 125.9, 116.3, 116.1, 116.0, 115.8, 70.4, 43.1; IR (KBr) ν 3409, 2974, 2924, 1677, 1599, 1510, 1454 cm<sup>-1</sup> HRMS m/z calcd for C<sub>16</sub>H<sub>12</sub>F<sub>2</sub>O<sub>3</sub> [M + H]<sup>+</sup> 291.0833, found 291.0839.

**1,4-Bis(4-methoxy-phenyl)-2-hydroxy--butan-1,4-dione (2f):** White solid: 0.19 g, 61% of yield; m.p. 122-124 °C; <sup>1</sup>H NMR (500 MHz, CDCl<sub>3</sub>) δ 3.32 (m, 2 H), 3.87 (s, 3 H), 3.89 (s, 3 H), 4.06 (d, 1 H, *J* = 6.0 Hz), 5.66 (m, 1 H), 6.94 (m, 2 H), 6.99 (m, 2 H), 7.95 (m, 2 H), 8.00 (m, 2 H); <sup>13</sup>C NMR (125 MHz, CDCl<sub>3</sub>) δ 199.2, 195.9, 164.2, 163.9, 131.2, 130.7, 130.0, 126.4, 114.2, 113.8, 69.9, 55.5, 43.6; IR (KBr) ν 3434, 2962, 2920, 1673, 1603, 1587, 1511, 1456 cm<sup>-1</sup>; HRMS m/z calcd for C<sub>18</sub>H<sub>18</sub>O<sub>5</sub> [M + H]<sup>+</sup> 315.1232, found 315.1238.

**1,4-Bis-(3,4-dimethyl-phenyl)-2-hydroxy-butane-1,4-dione (2g):** White solid: 0.24 g, 78% of yield; m.p. 110-111 °C; <sup>1</sup>H NMR (500 MHz, CDCl<sub>3</sub>) δ 2.31 (m, 12 H), 3.33 (m, 2 H), 4.00 (d, 1 H, *J* = 6.0 Hz), 5.66 (m, 1 H), 7.23 (m, 2 H), 7.69 (m, 4 H); <sup>13</sup>C NMR (125 MHz, CDCl<sub>3</sub>) δ 220.7, 197.0, 143.7, 143.1, 137.4, 137.0, 134.7, 131.4, 130.1, 129.9, 129.8, 129.5, 126.4, 126.1, 69.9, 43.8, 20.0, 19.7; IR (KBr) ν 3432, 2915, 1664, 1604, 1568, 1506, 1449, 1401 cm<sup>-1</sup>; HRMS m/z calcd for C<sub>20</sub>H<sub>22</sub>O<sub>3</sub> [M + H]<sup>+</sup> 311.1647, found 311.1640.

**1,4-Bis-(4-ethyl-phenyl)-2-hydroxy-butane-1,4-dione (2h):** White solid: 0.22 g, 72% of yield; m.p. 62-63 °C; <sup>1</sup>H NMR (500 MHz, CDCl<sub>3</sub>) δ 1.25 (m, 6 H), 2.71 (m, 4 H), 3.35 (m, 2 H), 4.00 (d, 1 H, *J* = 6.0 Hz), 5.67 (m, 1 H), 7.27 (m, 2 H), 7.32 (m, 2 H), 7.87 (m, 2 H),

7.92 (m, 2 H);  $^{13}\text{C}$  NMR (125 MHz,  $\text{CDCl}_3$ ).  $\delta$  200.4, 196.8, 151.2, 150.6, 134.5, 131.1, 129.0, 128.6, 128.5, 128.2, 70.0, 43.7, 29.0, 15.1; IR (KBr)  $\nu$  3441, 2967, 2930, 1676, 1607, 1570, 1411  $\text{cm}^{-1}$ ; HRMS  $m/z$  calcd for  $\text{C}_{20}\text{H}_{22}\text{O}_3$   $[\text{M} + \text{H}]^+$  311.1647, found 311.1652.

**1,4-Bis-(4-isopropyl-phenyl)-2-hydroxy-butane-1,4-dione (2i):** White solid: 0.25 g, 75% of yield; m.p. 68-69°C;  $^1\text{H}$  NMR (500 MHz,  $\text{CDCl}_3$ )  $\delta$  1.25 (s, 3 H), 1.26 (s, 6 H), 1.27 (s, 3 H), 2.96 (m, 2 H), 3.36 (m, 2 H), 4.02 (s, 1 H), 5.67 (m, 1 H), 7.29 (m, 2 H), 7.33 (m, 2 H), 7.88 (m, 2 H), 7.92 (m, 2 H);  $^{13}\text{C}$  NMR (125 MHz,  $\text{CDCl}_3$ ).  $\delta$  200.4, 196.7, 155.7, 155.2, 134.5, 131.2, 129.0, 128.6, 127.0, 126.7, 70.0, 43.7, 34.3, 23.6; IR (KBr)  $\nu$  3446, 2956, 2918, 2869, 1670, 1605, 1569, 1418  $\text{cm}^{-1}$ ; HRMS  $m/z$  calcd for  $\text{C}_{22}\text{H}_{26}\text{O}_3$   $[\text{M} + \text{H}]^+$  339.1960, found 339.1965.

**2-Hydroxy-1,4-bis(5,6,7,8-tetrahydronaphthalen-2-yl)butane-1,4-dione (2j):** White solid: 0.27 g, 76% of yield; m.p. 86-87°C;  $^1\text{H}$  NMR (500 MHz,  $\text{CDCl}_3$ )  $\delta$  1.80 (m, 8 H), 2.80 (m, 8 H), 3.33 (m, 2 H), 4.00 (d, 1 H,  $J = 6$  Hz), 5.65 (m, 1 H), 7.14 (m, 2 H), 7.65 (m, 4 H);  $^{13}\text{C}$  NMR (125 MHz,  $\text{CDCl}_3$ )  $\delta$  200.8, 197.0, 144.4, 143.8, 138.0, 137.5, 134.2, 130.8, 129.6, 129.4, 129.3, 125.7, 125.4, 69.8, 43.8, 29.7, 29.3, 22.7; IR (KBr)  $\nu$  456, 2934, 2857, 2833, 1726, 1663, 1601, 1571, 1419  $\text{cm}^{-1}$ ; HRMS  $m/z$  calcd for  $\text{C}_{24}\text{H}_{26}\text{O}_3$   $[\text{M} + \text{H}]^+$  363.1960, found 363.1965.

**1,4-Diphenyl-butane-1,4-dione (3a):**<sup>19b</sup> Straw yellow solid: 0.17 g, 73% of yield; m.p. 145-146°C (lit. 144-145°C);<sup>19b</sup>  $^1\text{H}$  NMR (500 MHz,  $\text{CDCl}_3$ )  $\delta$  3.48 (s, 4 H), 7.49 (m, 4 H), 7.58 (m, 2 H), 8.05 (m, 4 H); IR (KBr)  $\nu$  3441, 2881, 2827, 2675, 2631  $\text{cm}^{-1}$ .

**1,4-Bis(4-chloro-phenyl)butane-1,4-dione (3b):**<sup>19c</sup> Red solid: 0.22 g, 71% of yield; m.p. 149-151 °C (lit. 151-152°C);<sup>19c</sup>  $^1\text{H}$  NMR (500 MHz,  $\text{CDCl}_3$ ):  $\delta$  3.43 (s, 4 H), 7.46 (d, 4 H,  $J = 8.5$  Hz), 7.98 (d, 4 H,  $J = 8.5$  Hz); IR (KBr) 3409, 3091, 1727, 1676  $\text{cm}^{-1}$ .

**1,4-Dip-tolybutane-1,4-dione (3c):**<sup>19d</sup> Red solid: 0.18 g, 66% of yield; m.p. 160-162 °C. (lit. 161°C);<sup>19d</sup>  $^1\text{H}$  NMR (500 MHz,  $\text{CDCl}_3$ ):  $\delta$  2.40 (s, 6 H), 3.40 (s, 4 H), 7.25 (d, 4 H,  $J = 8.0$  Hz), 7.91 (d, 4 H,  $J = 8.0$  Hz).

**1,4-Bis(4-ethylphenyl)-butane-1,4-dione (3d):**<sup>19e</sup> White solid: 0.21 g, 70% of yield; m.p.

123-125 °C; <sup>1</sup>H NMR (500 MHz, CDCl<sub>3</sub>): δ 1.25 (t, 6 H, *J* = 7.6 Hz), 2.72 (q, 4 H, *J* = 7.6 Hz), 3.44 (s, 4 H), 7.30 (d, 4 H, *J* = 8.0 Hz), 7.96 (d, 4 H, *J* = 8.0 Hz); <sup>13</sup>C NMR (125 MHz, CDCl<sub>3</sub>) δ 198.5, 150.1, 134.6, 128.4, 128.1, 32.6, 29.0, 15.2.

**1,4-Bis(3,4-xylene)-butan-1,4-dione (3e):**<sup>19f</sup> Red solid: 0.22 g, 74% of yield; m.p. 158-160 °C (lit. 157 °C); <sup>19f1</sup>H NMR (500 MHz, CDCl<sub>3</sub>): δ 2.33 (s, 6 H), 2.35 (s, 6 H), 3.42 (s, 4 H), 7.24 (m, 2 H), 7.79 (m, 4 H); <sup>13</sup>C NMR (125 MHz, CDCl<sub>3</sub>) δ 198.8, 142.6, 136.9, 134.8, 129.8, 129.3, 125.9, 32.6, 20.0, 19.8.

**[2,3-Bis-(4-methyl-benzoyl)-cyclopropyl]-p-tolyl-methanone (4a):**<sup>19g</sup> White solid: 83 mg, 21% of yield; m.p. 151-153°C(lit. 147-148 °C); <sup>19g</sup> <sup>1</sup>H NMR (500 MHz, CDCl<sub>3</sub>) δ 2.38 (s, 6 H), 2.44 (s, 3 H), 3.71 (d, 2 H, *J* = 6.0 Hz), 4.20 (t, 1 H, *J* = 6.0 Hz), 7.21 (d, 2 H, *J* = 8.0 Hz), 7.31 (d, 2 H, *J* = 8.0 Hz), 7.91 (d, 4 H, *J* = 8.0 Hz), 8.09 (d, 2 H, *J* = 8.0 Hz); <sup>13</sup>C NMR (125 MHz, CDCl<sub>3</sub>) δ 195.8, 192.6, 144.8, 144.3, 134.2, 129.5, 129.3, 128.9, 128.6, 36.3, 30.2, 21.7.

**(E)-1,4-bis(4-methoxyphenyl)but-2-ene-1,4-dione (5a):**<sup>19h</sup> Yellow solid: 0.14 g, 46% of yield; m.p. 160-162°C (167-168.5°C); <sup>19h1</sup>H NMR (500 MHz, CDCl<sub>3</sub>) δ 3.90 (s, 6 H), 7.00 (m, 4 H), 8.02 (s, 2 H), 8.08 (m, 4 H); <sup>13</sup>C NMR (125 MHz, CDCl<sub>3</sub>) δ 188.1, 164.2, 134.6, 131.3, 130.1, 114.1, 55.5; IR (KBr): 3779, 3428, 2976, 2891, 2830, 1641, 1601cm<sup>-1</sup>.

## Referneces

(19) (a) S. Sayama, *Synth. Commun.* 2005, **35**, 2115-2124. (b) D. C. Magri, *Chem. Eur. J.* 2008, **14**, 1698-1709. (c) A. Bhunia, S. R. Yetra, S. S. Bhojgude, A. T. Biju, *Org. Lett.* 2012, **14**, 2830–2833. (d) C. Peppe, *Synlett.* 2004, **7**, 1187-1190. (e) G. X. Hua, J. B. Henry, Y. Li, A. R. Mount, *Org. Biomol. Chem.* 2010, **8**, 1655–1660. (f) H.-D. Becker, *J. Org. Chem.* 1967, **32**, 2140-2144. (g) H.-W. Hu, W.-X. Chen, M. Tao, J.-Y. Gao, *Acta Chim. Sinica* 1987, **45**, 204-207 (in Chinese). (h) K. Xu, Y. Fang, Z. C. Yan, Z. U. Wang, *Org. Lett.* 2013, **15**, 2148–2151.

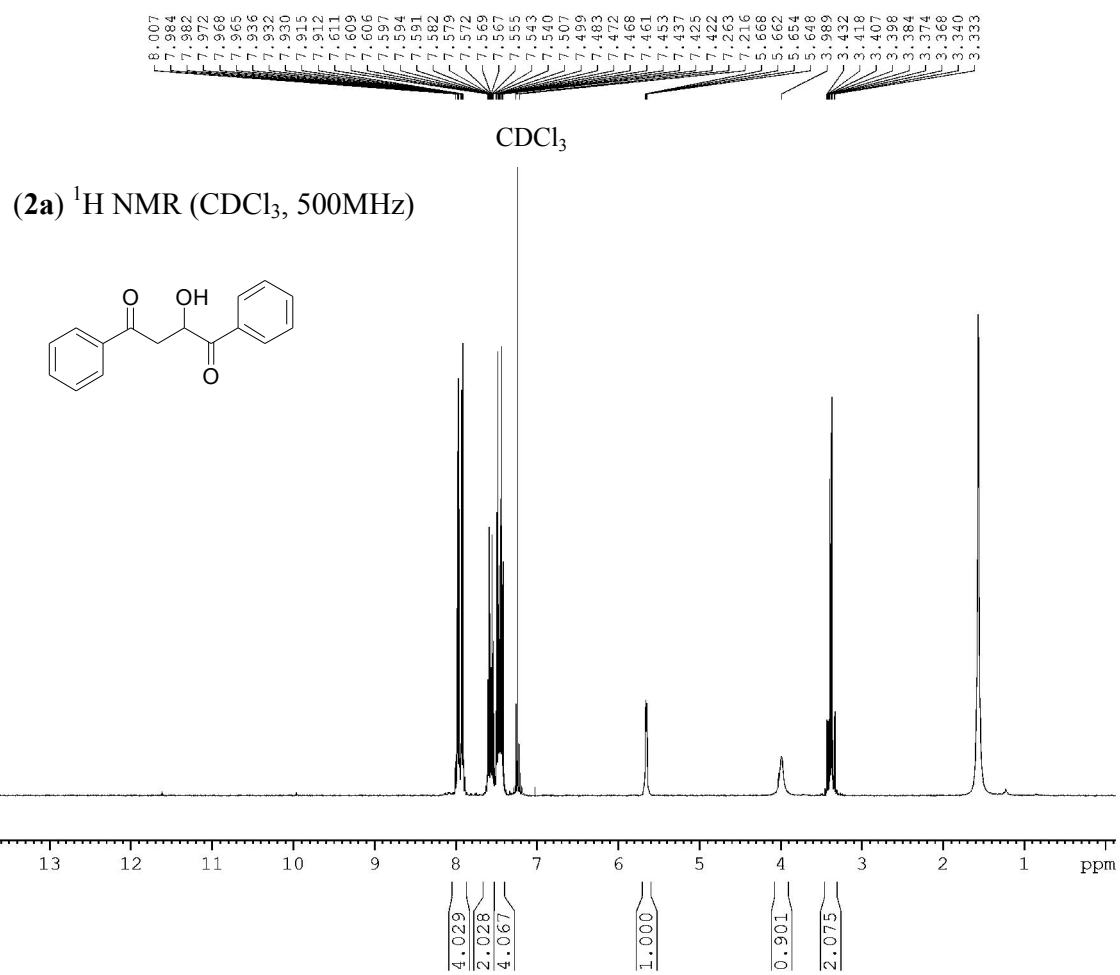

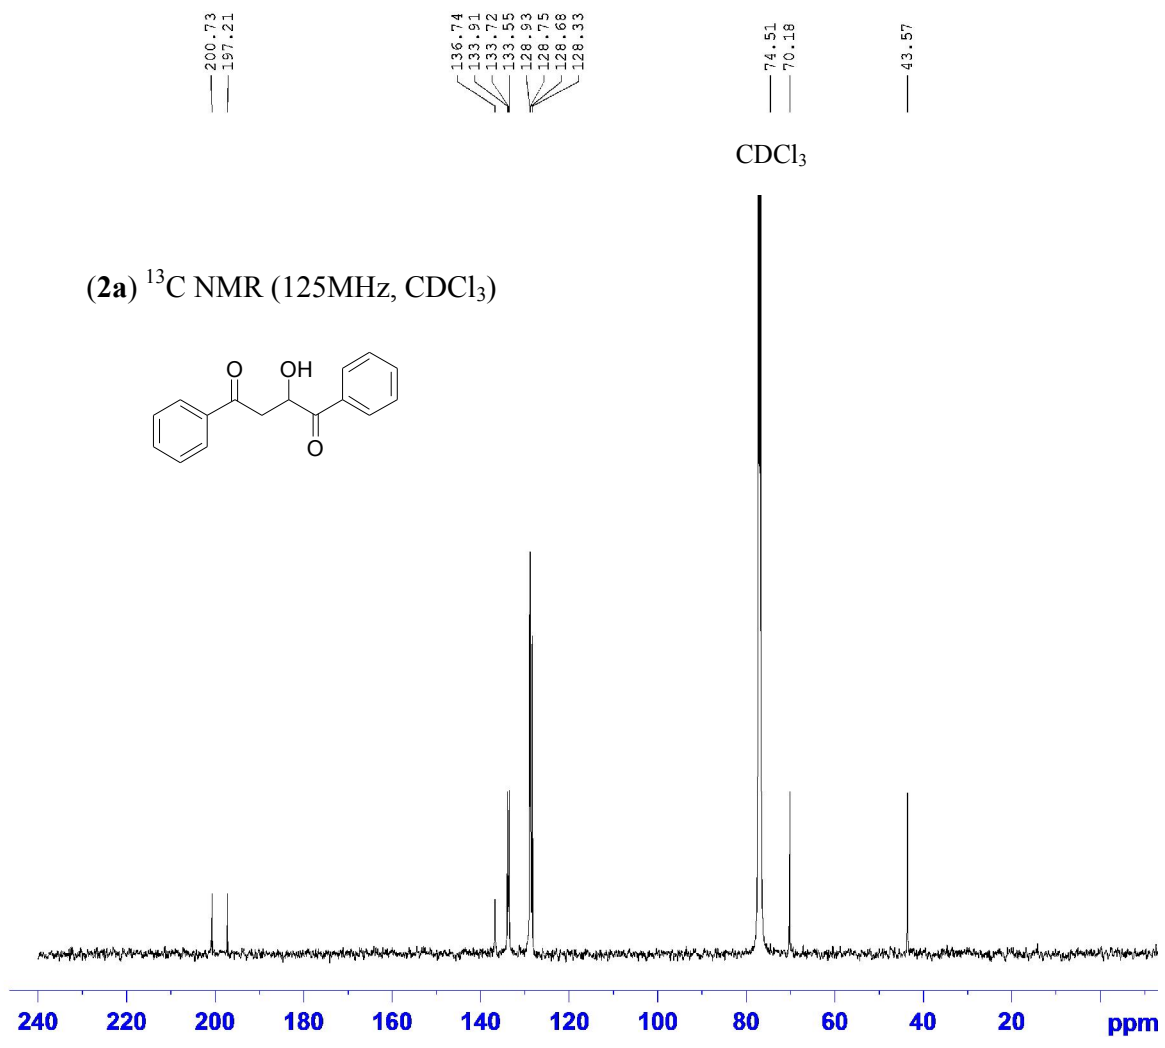

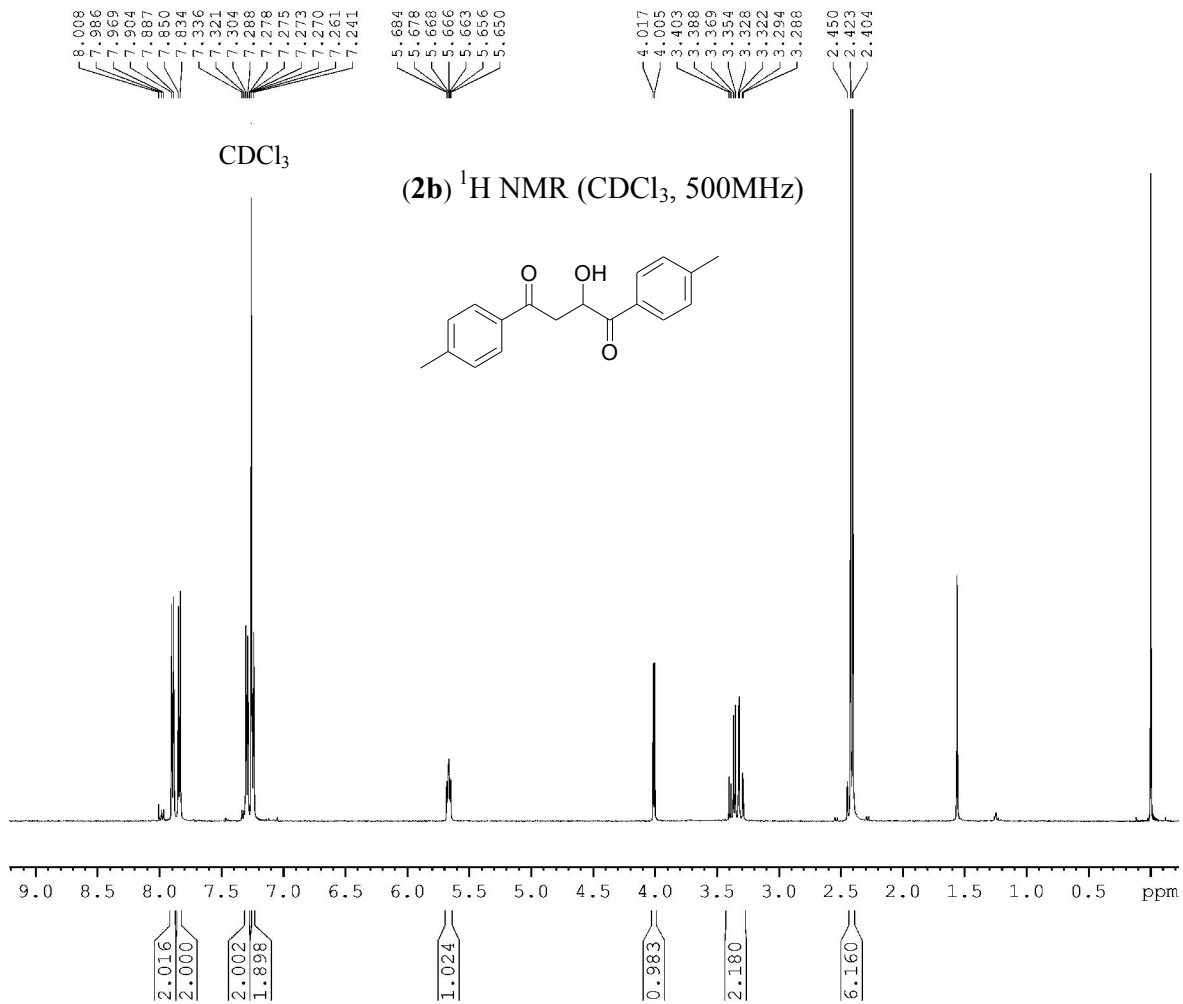



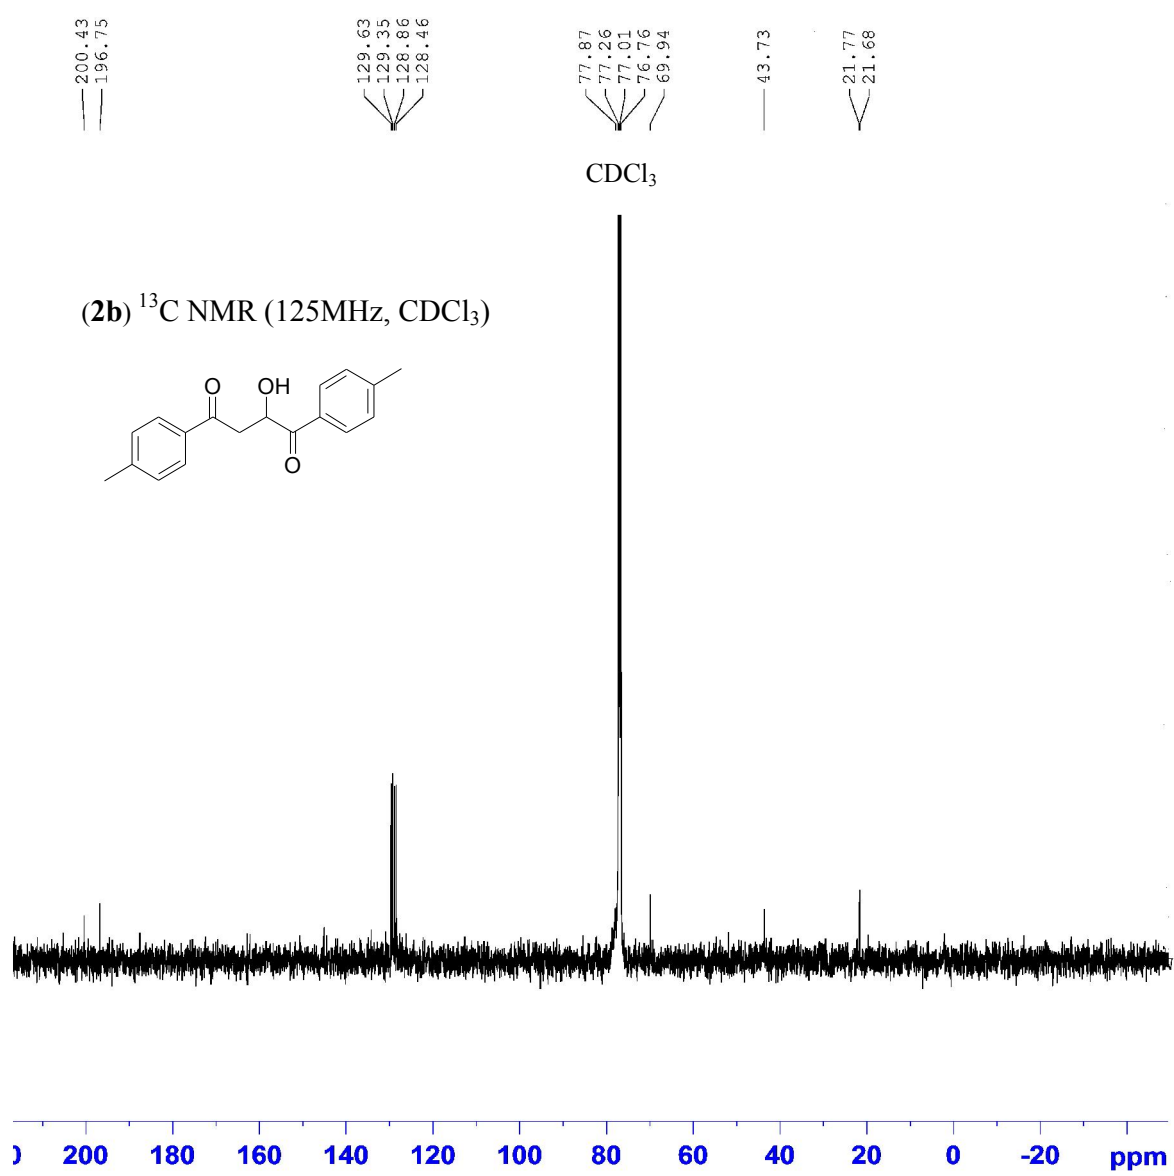

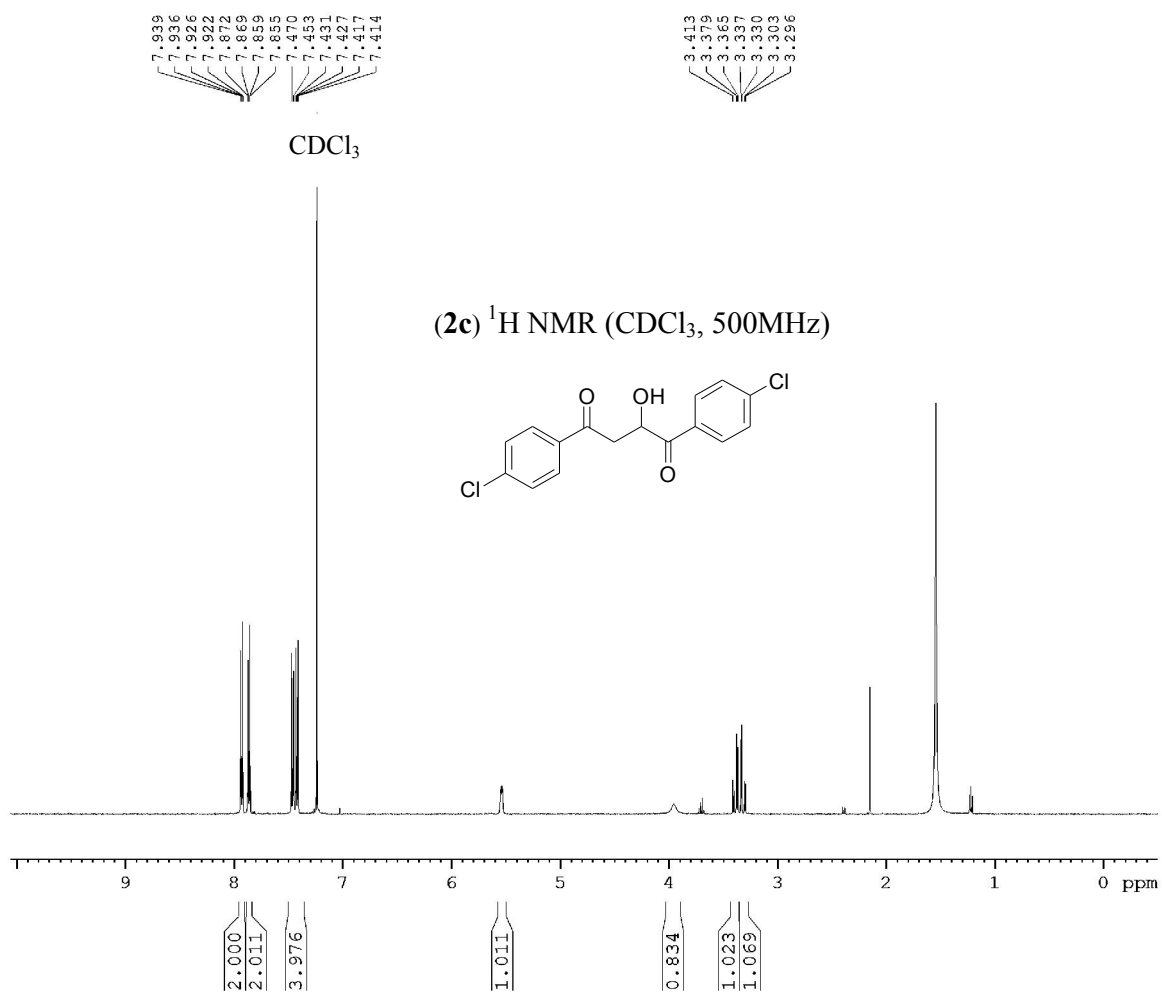

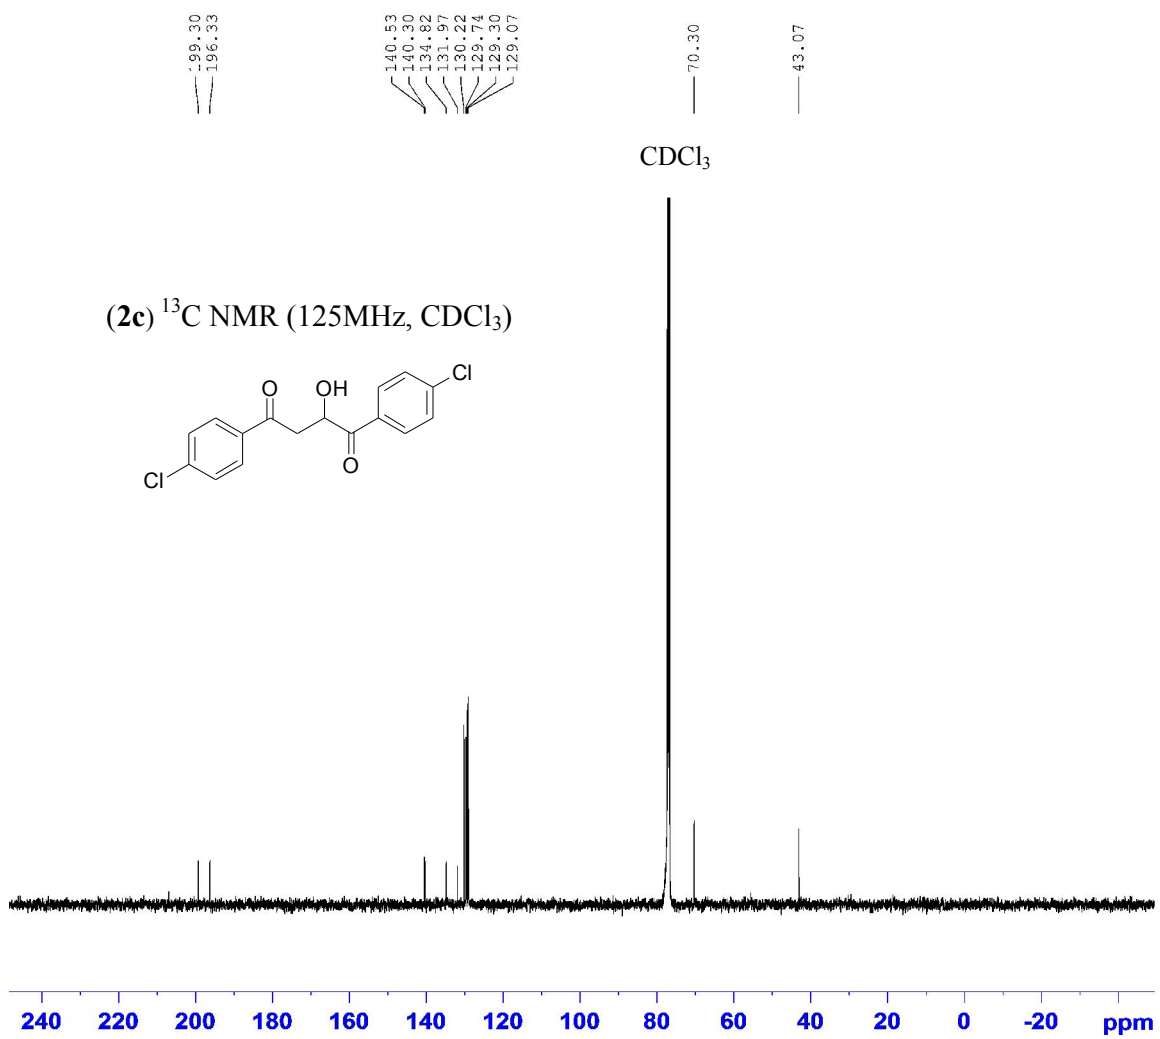

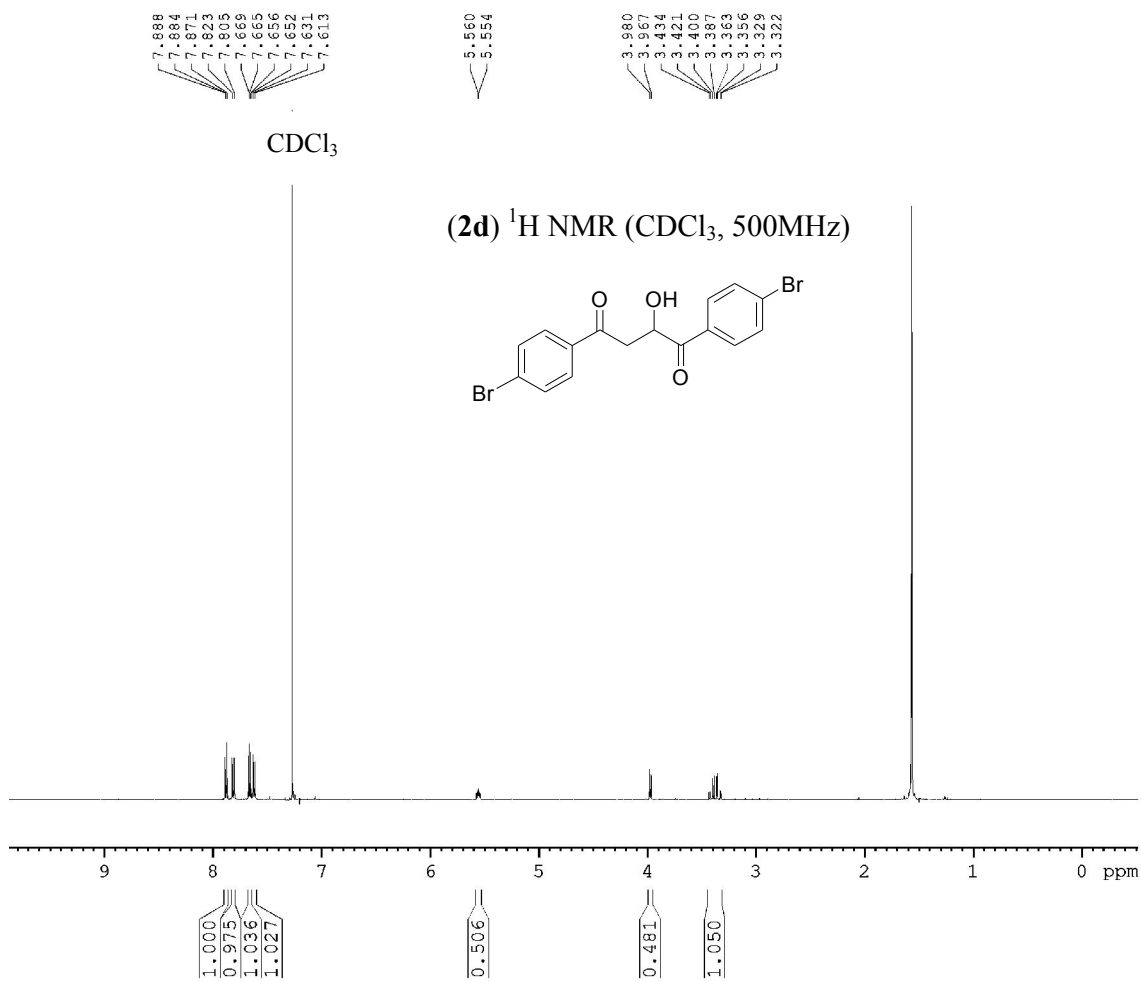

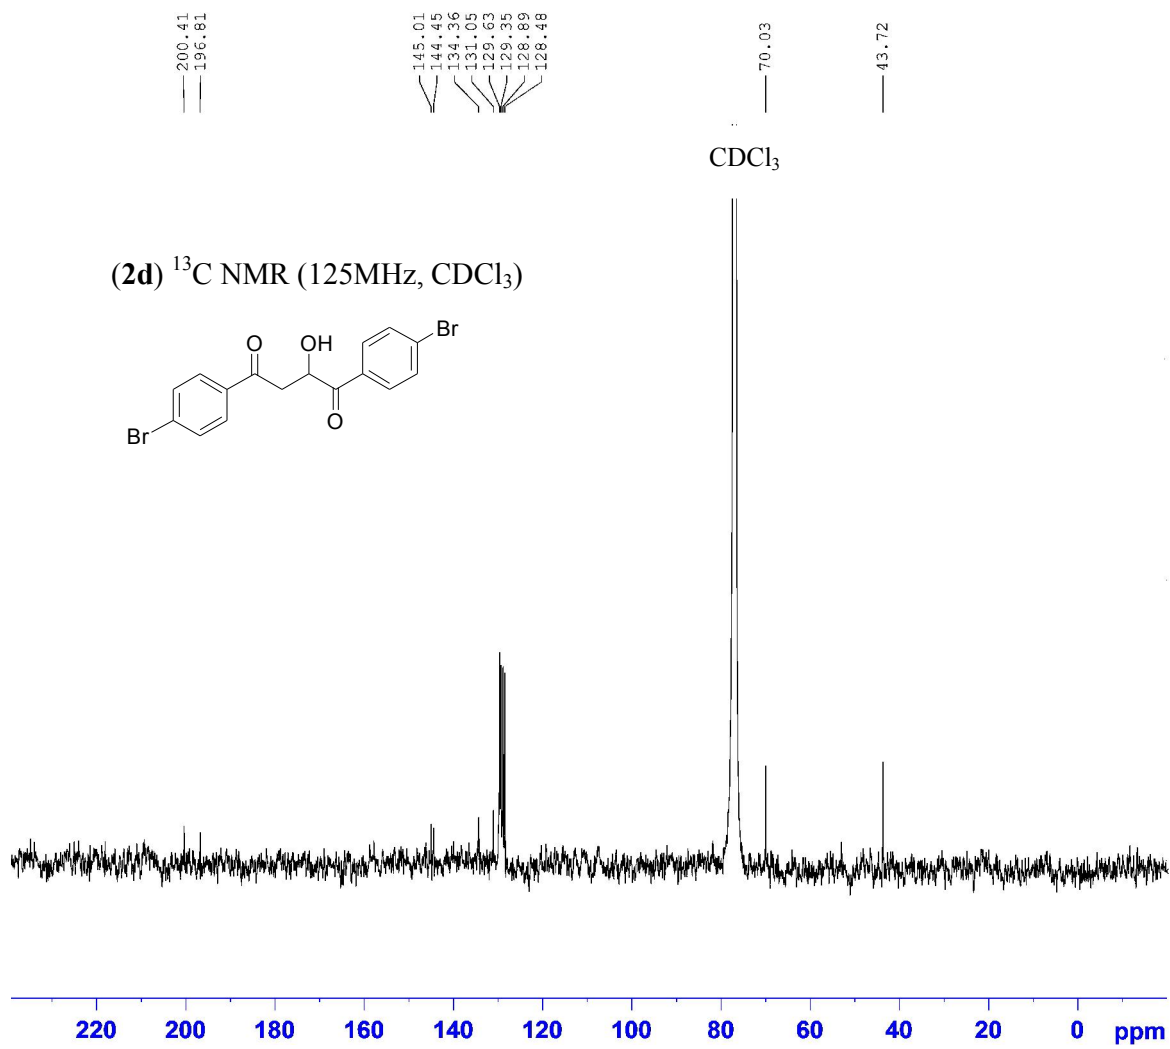

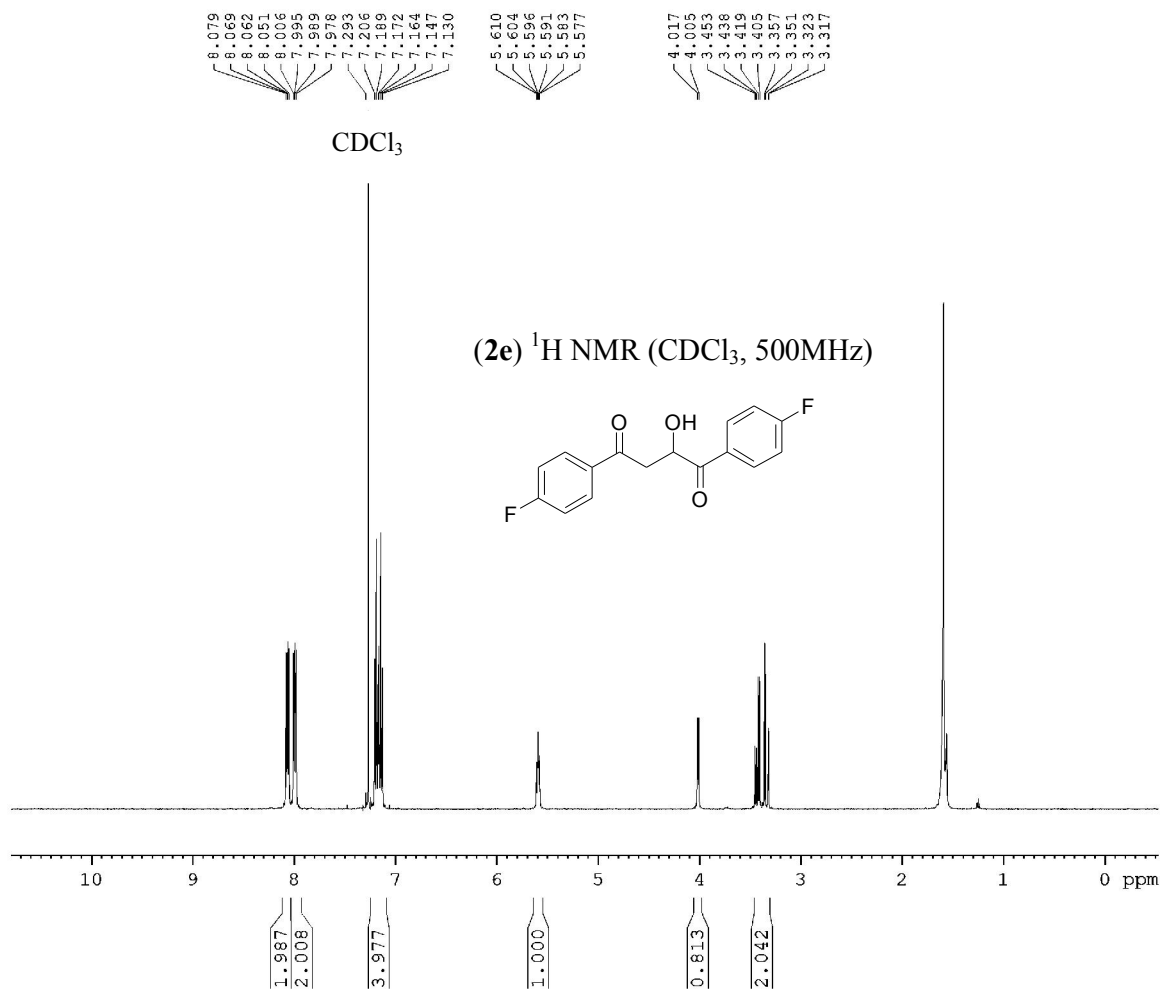

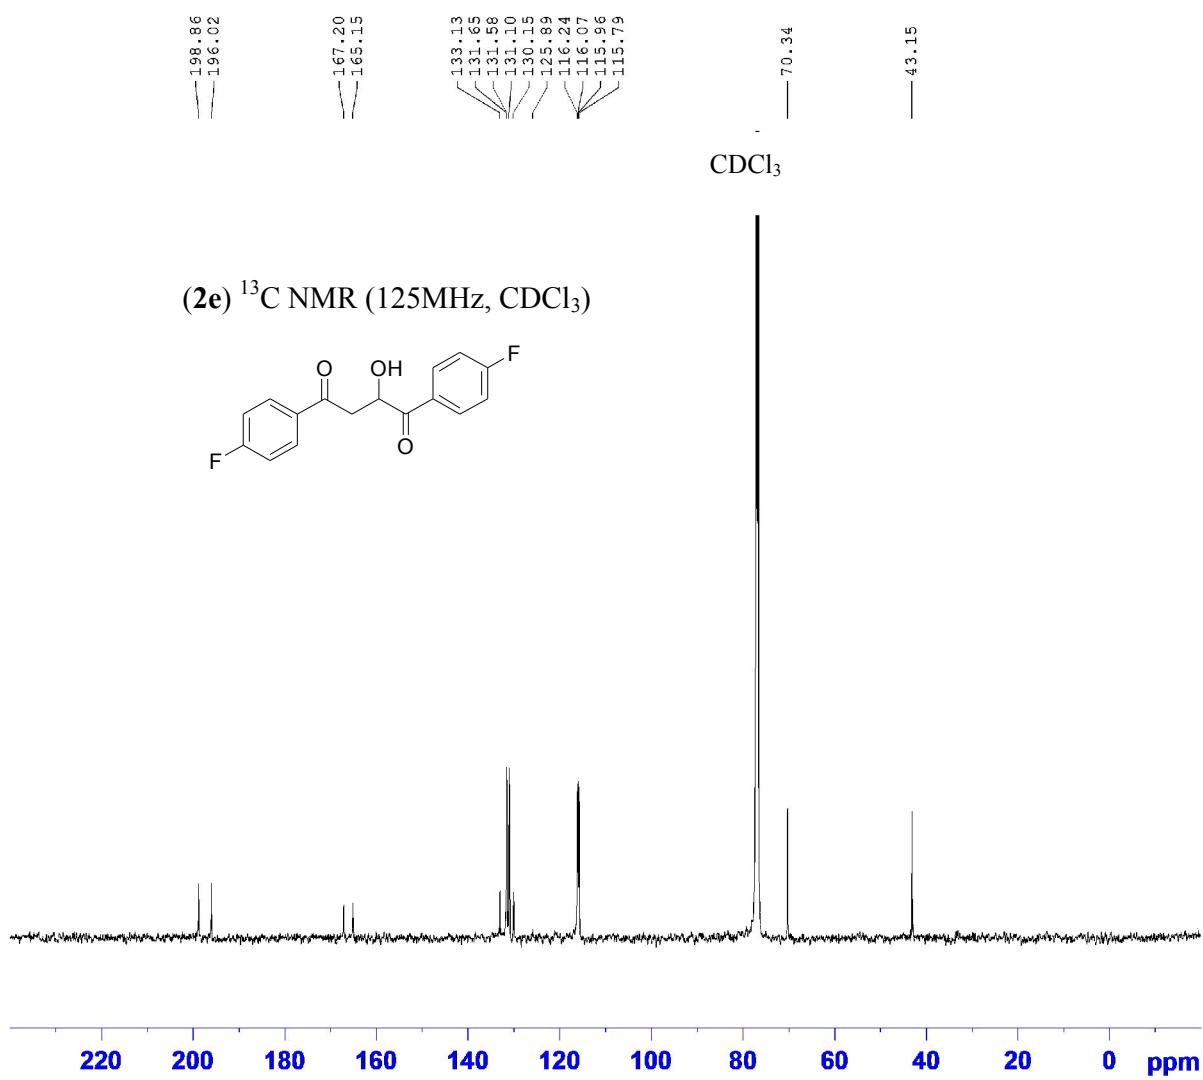

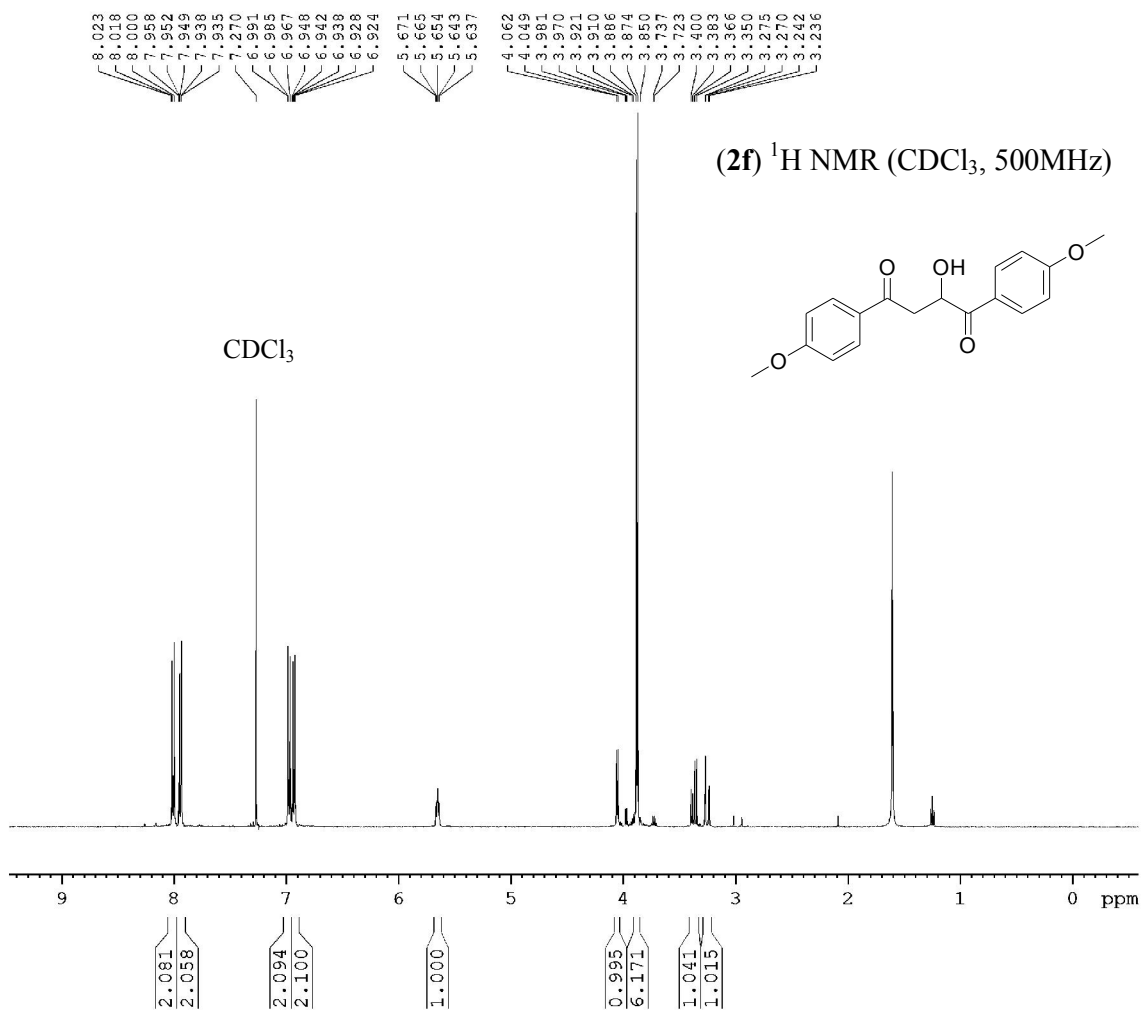



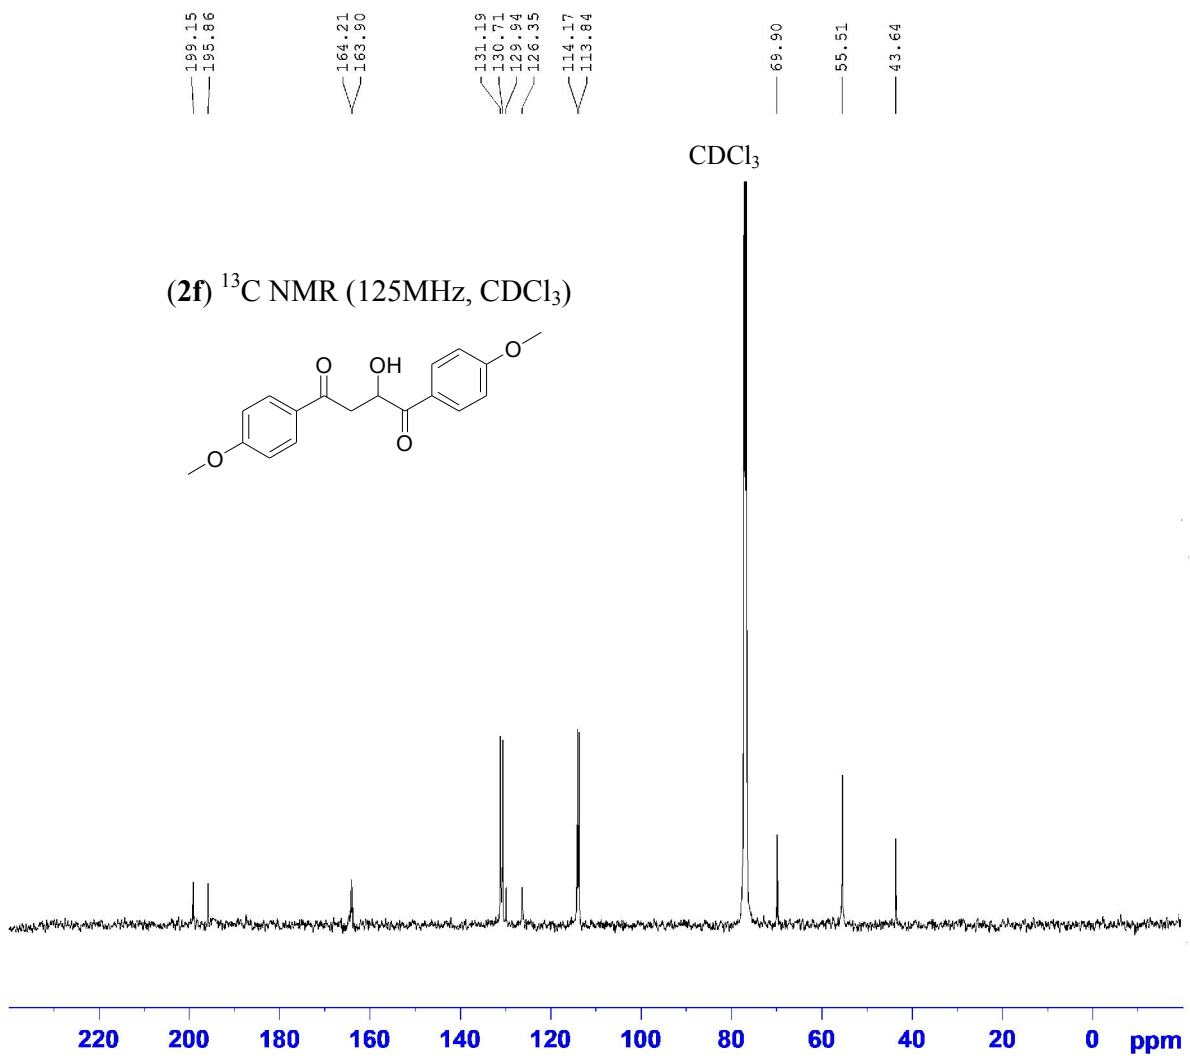

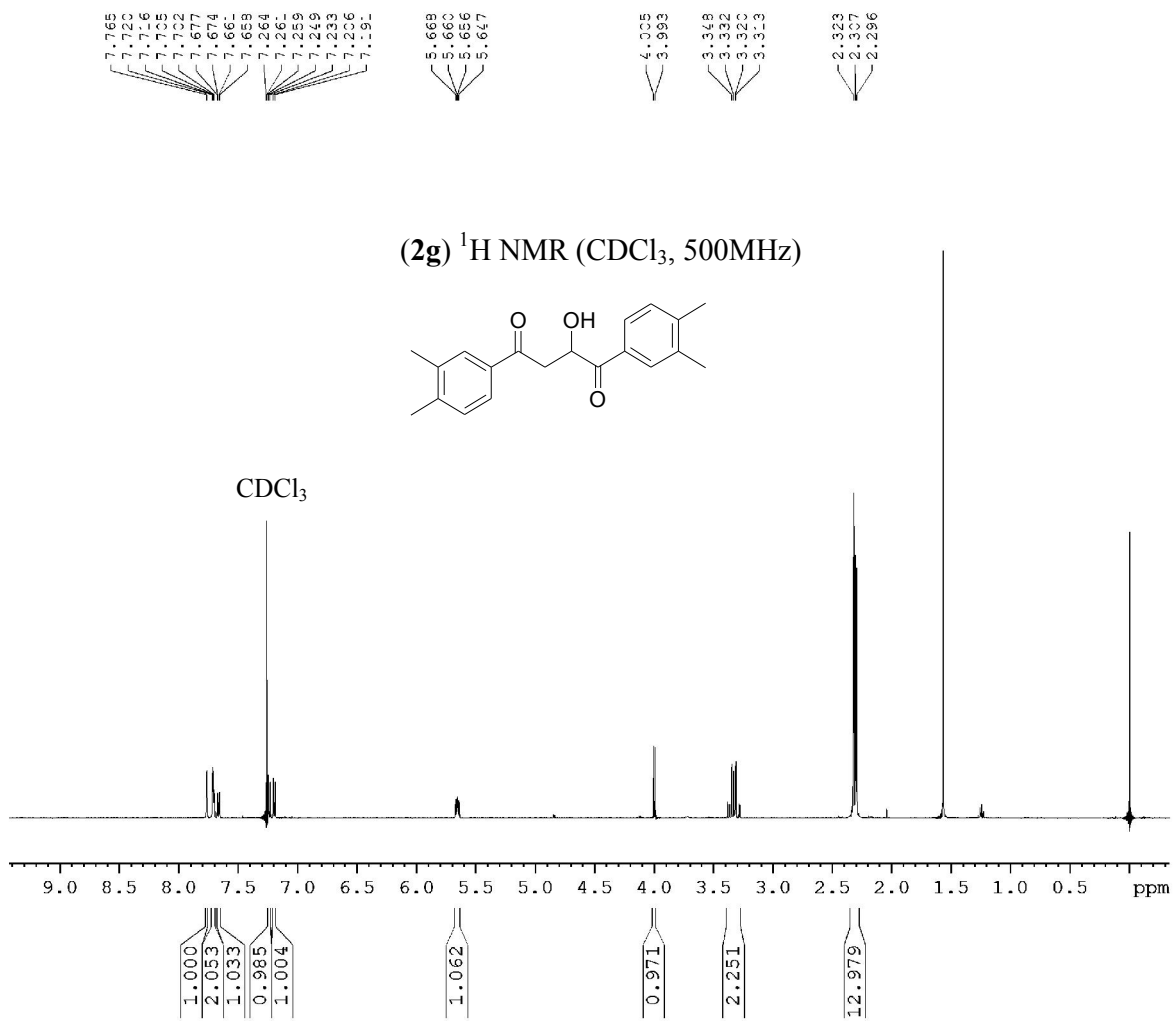

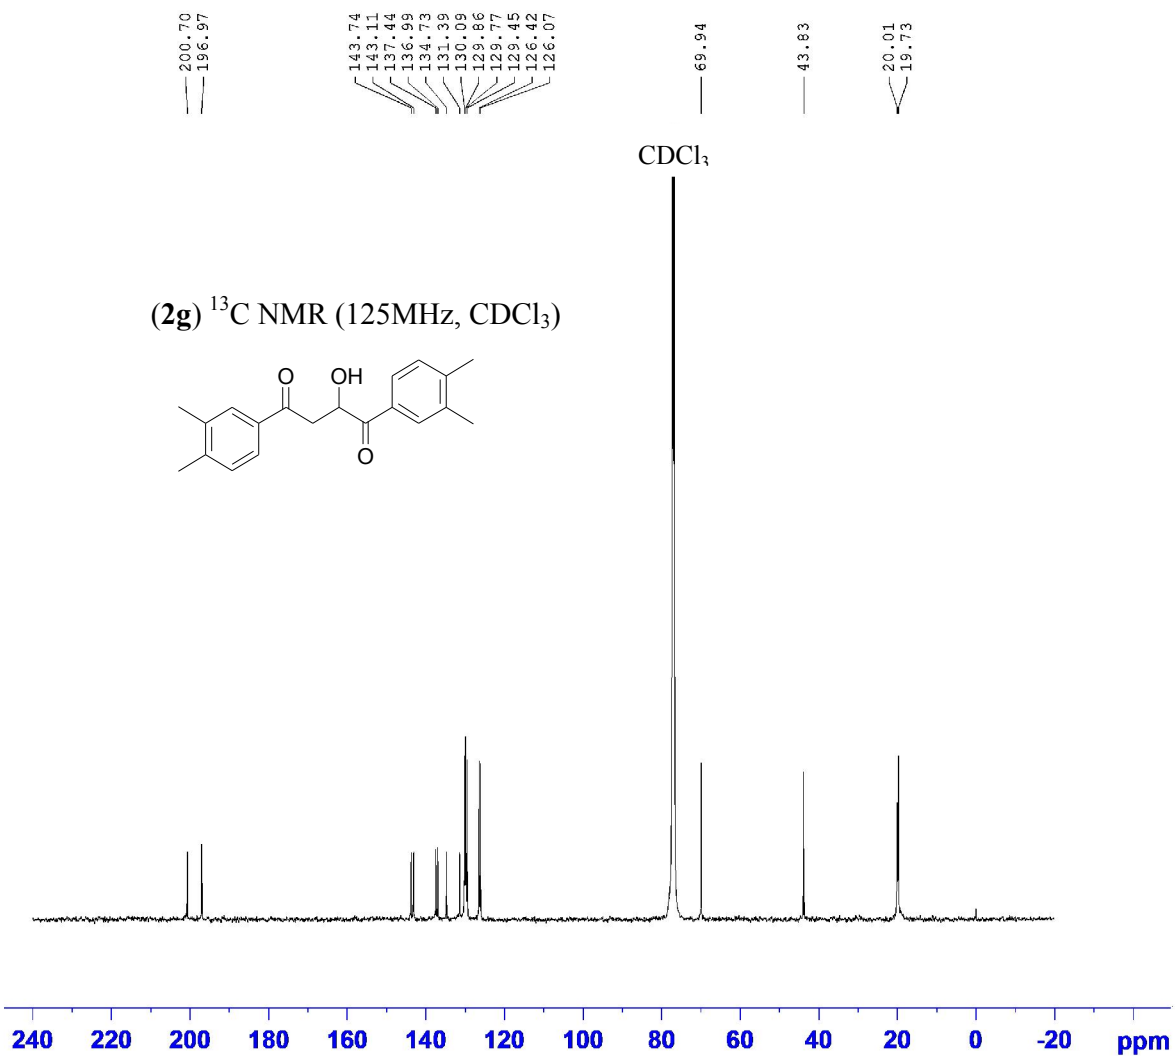

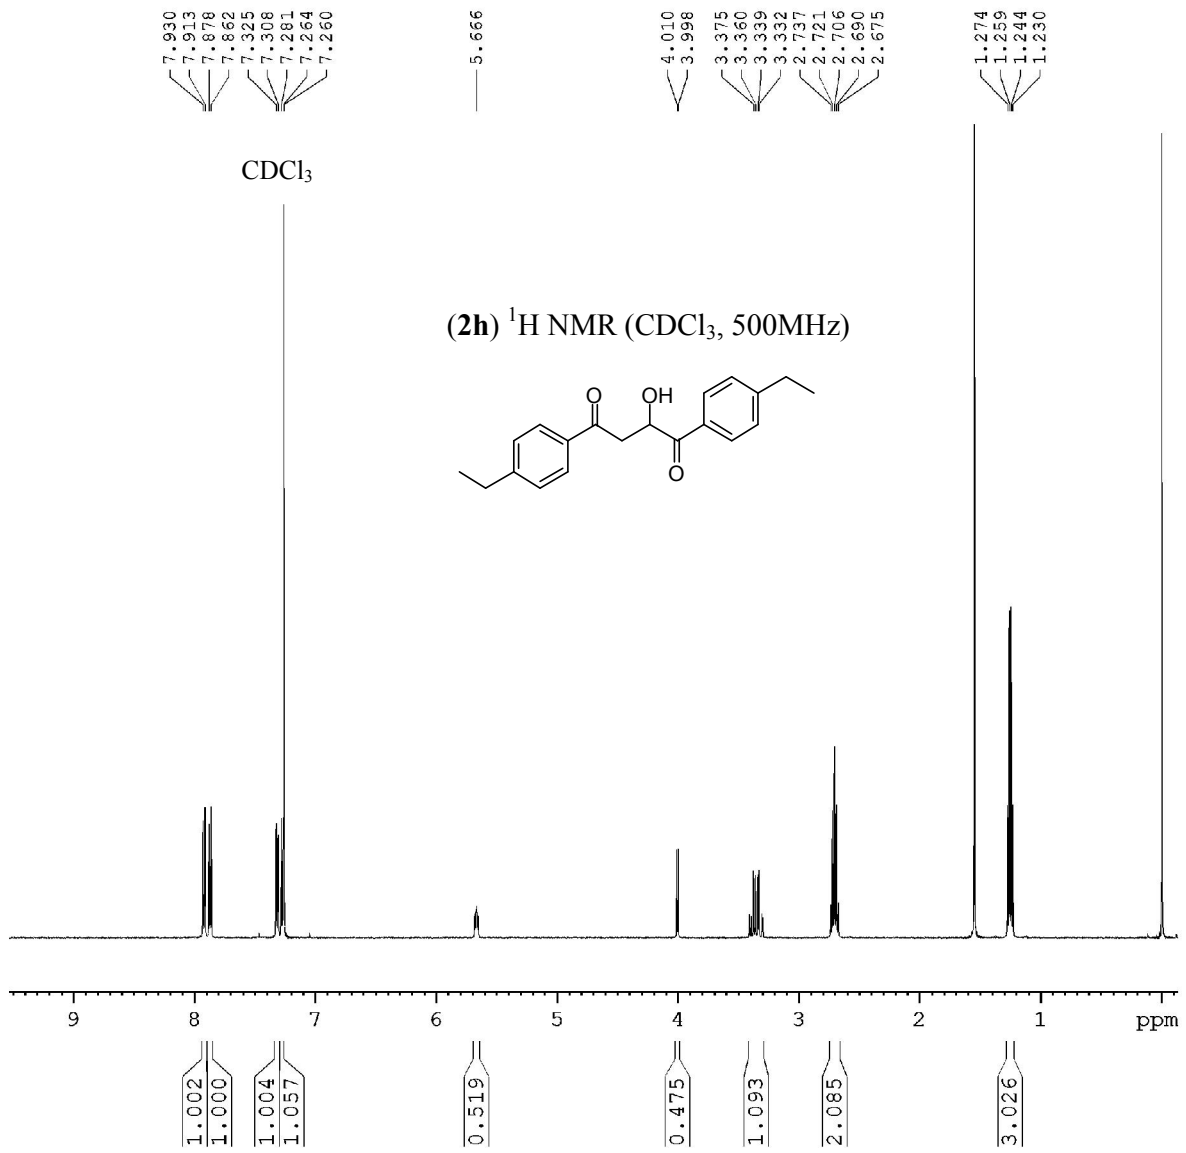

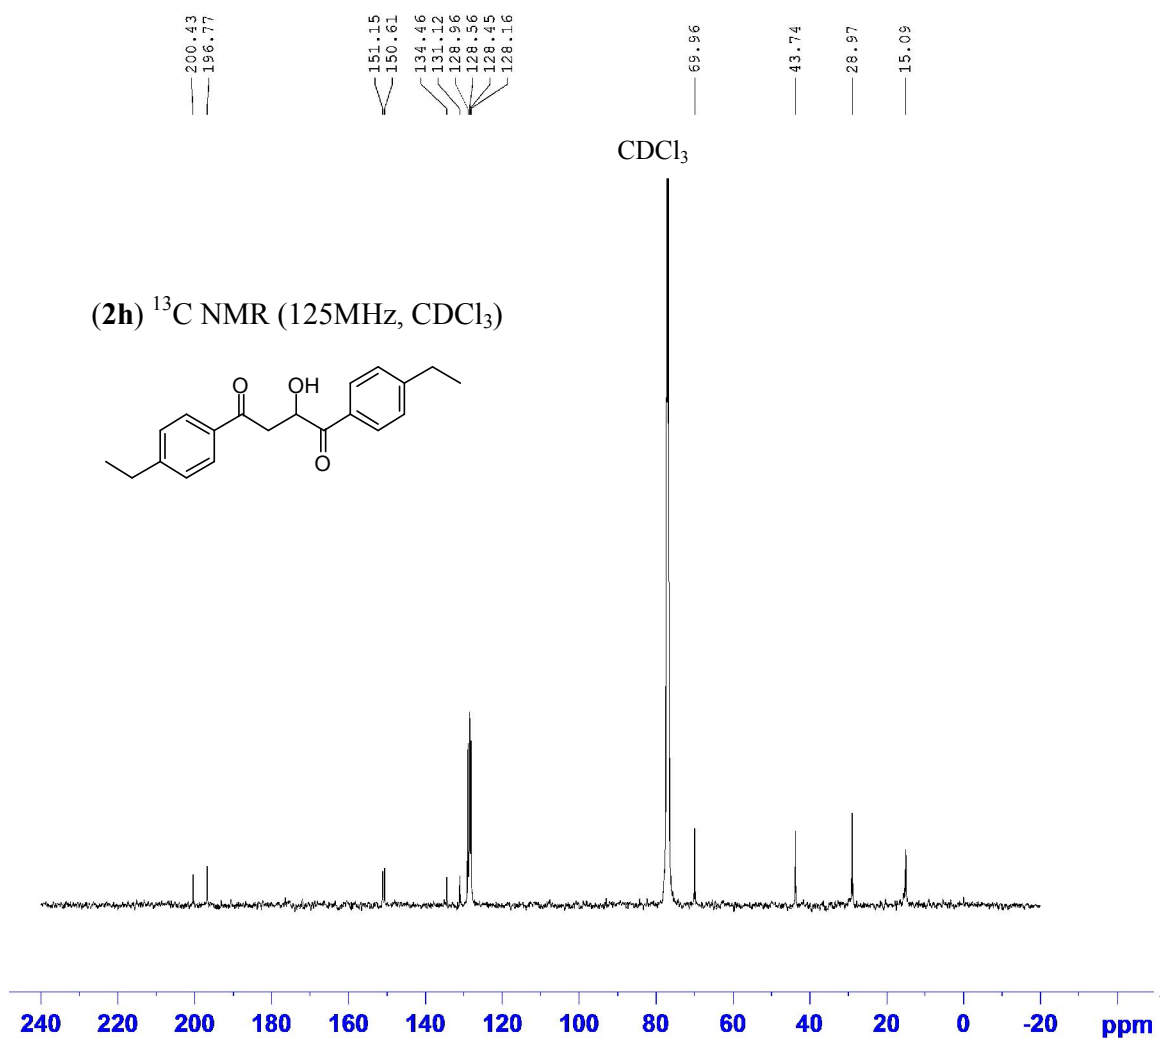

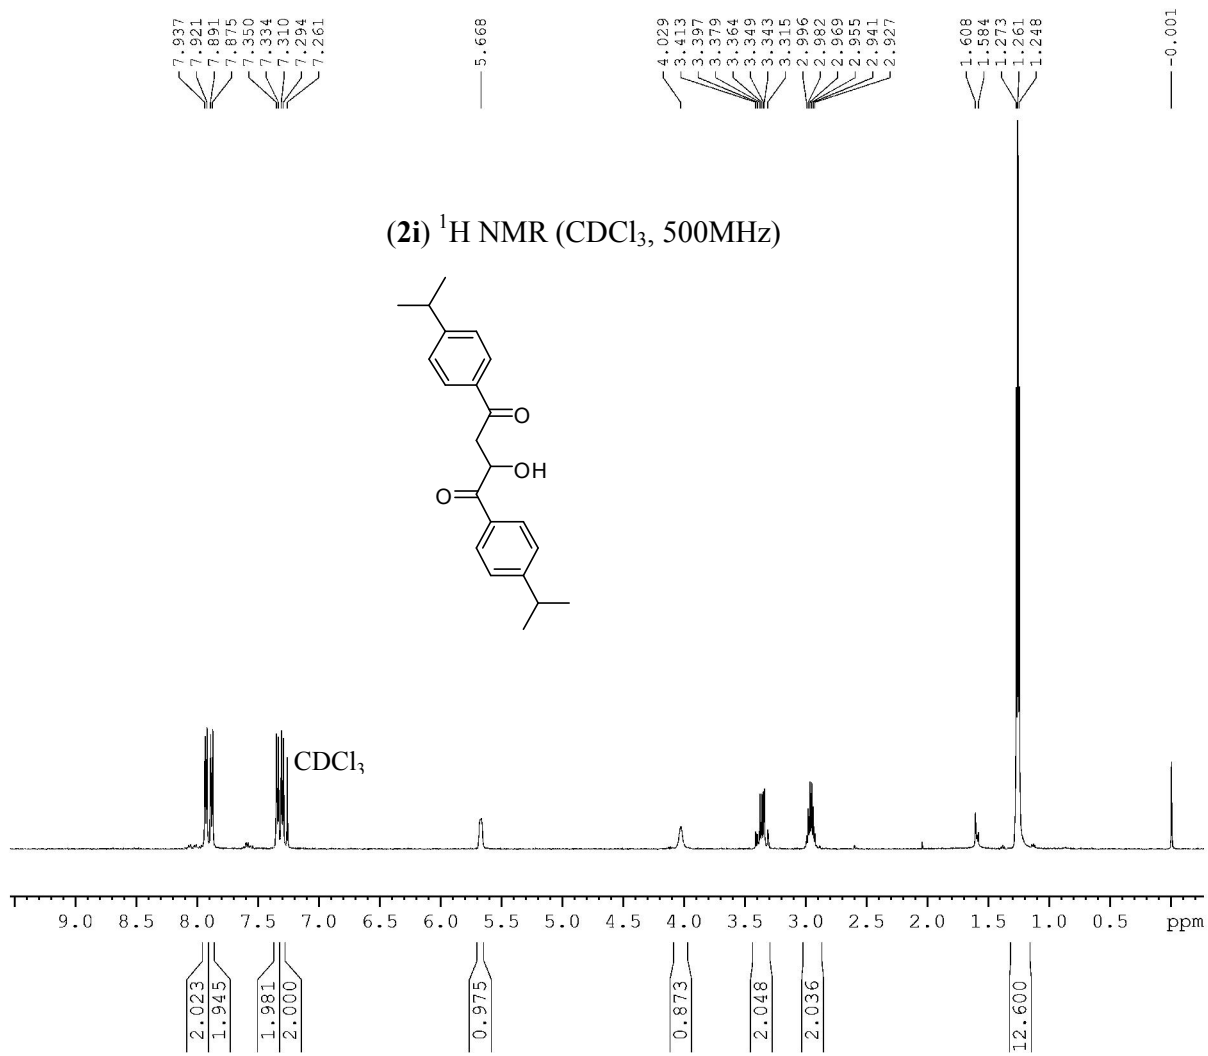

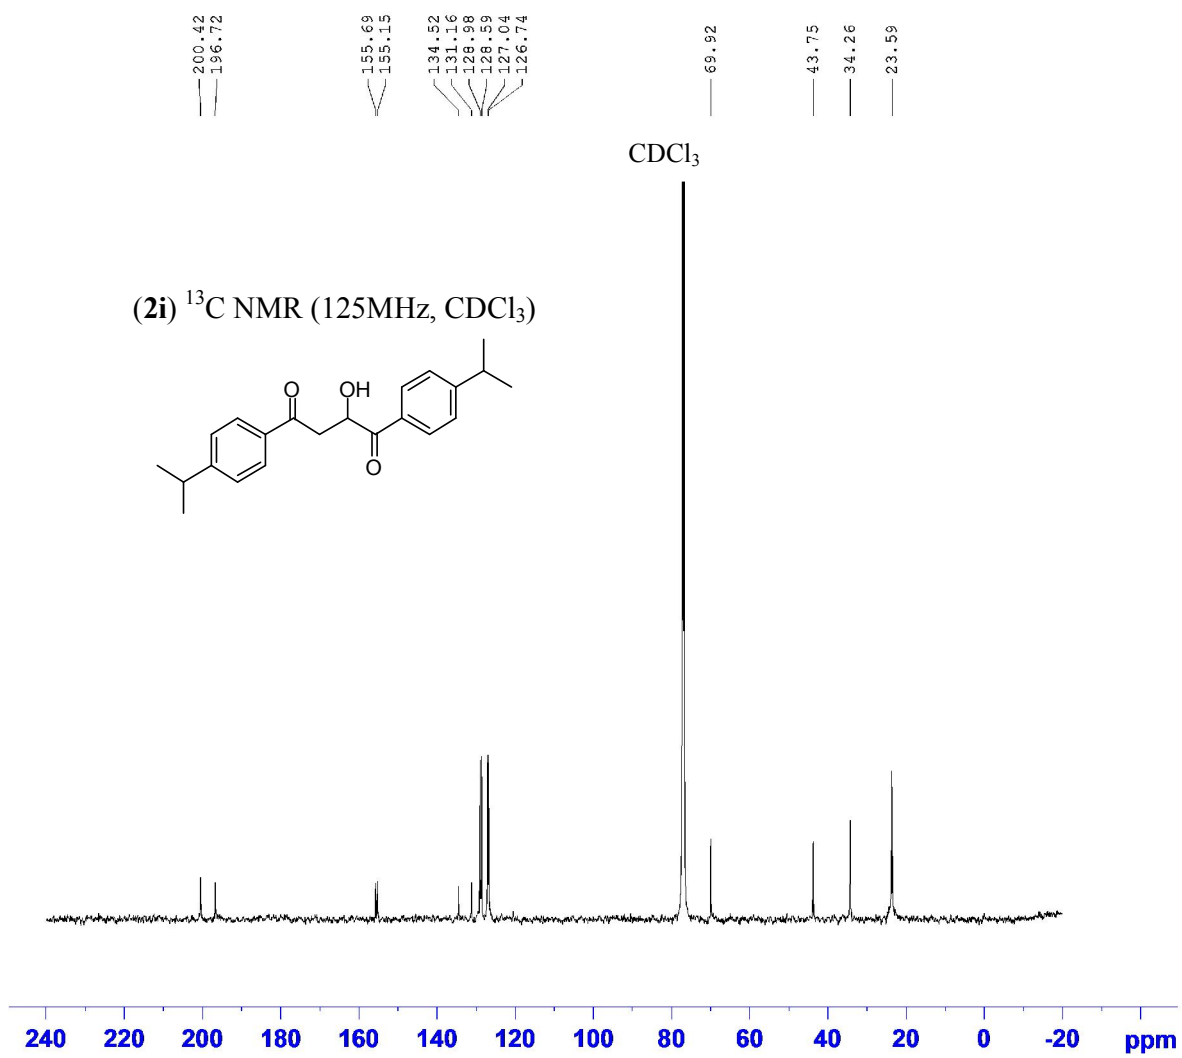

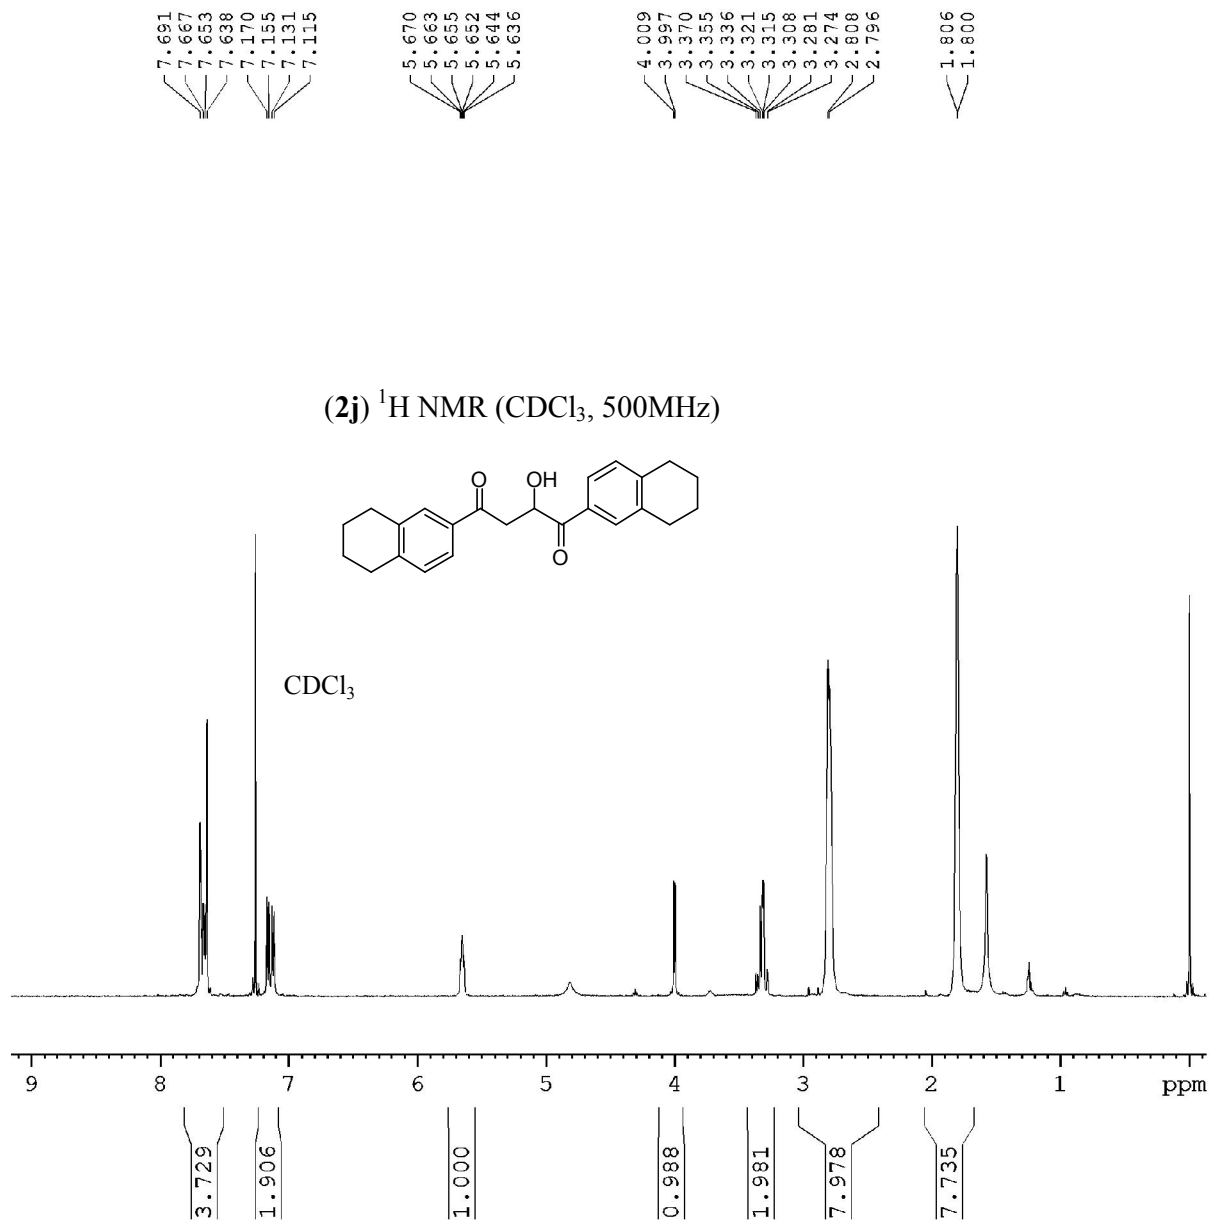



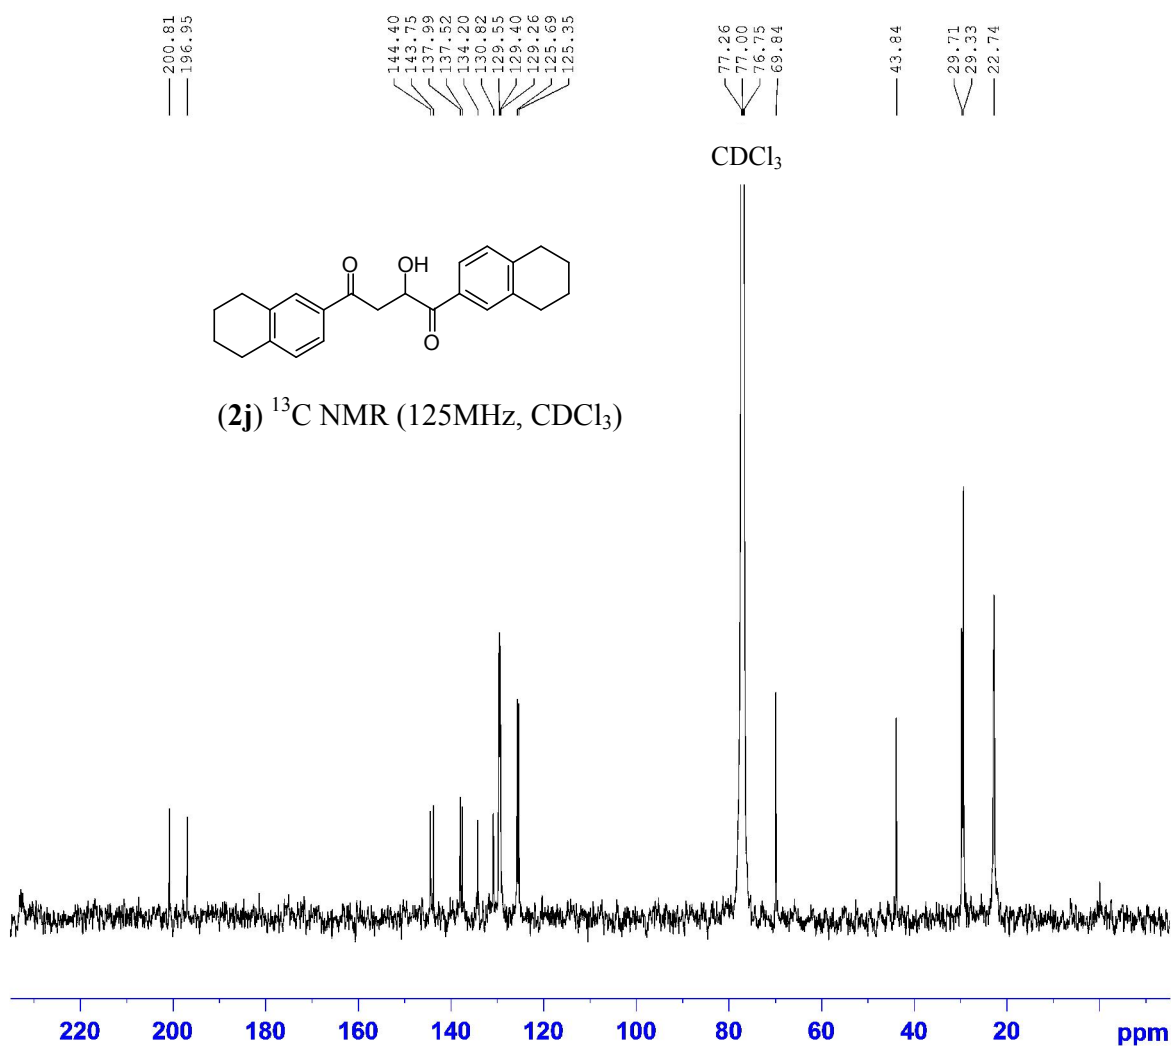

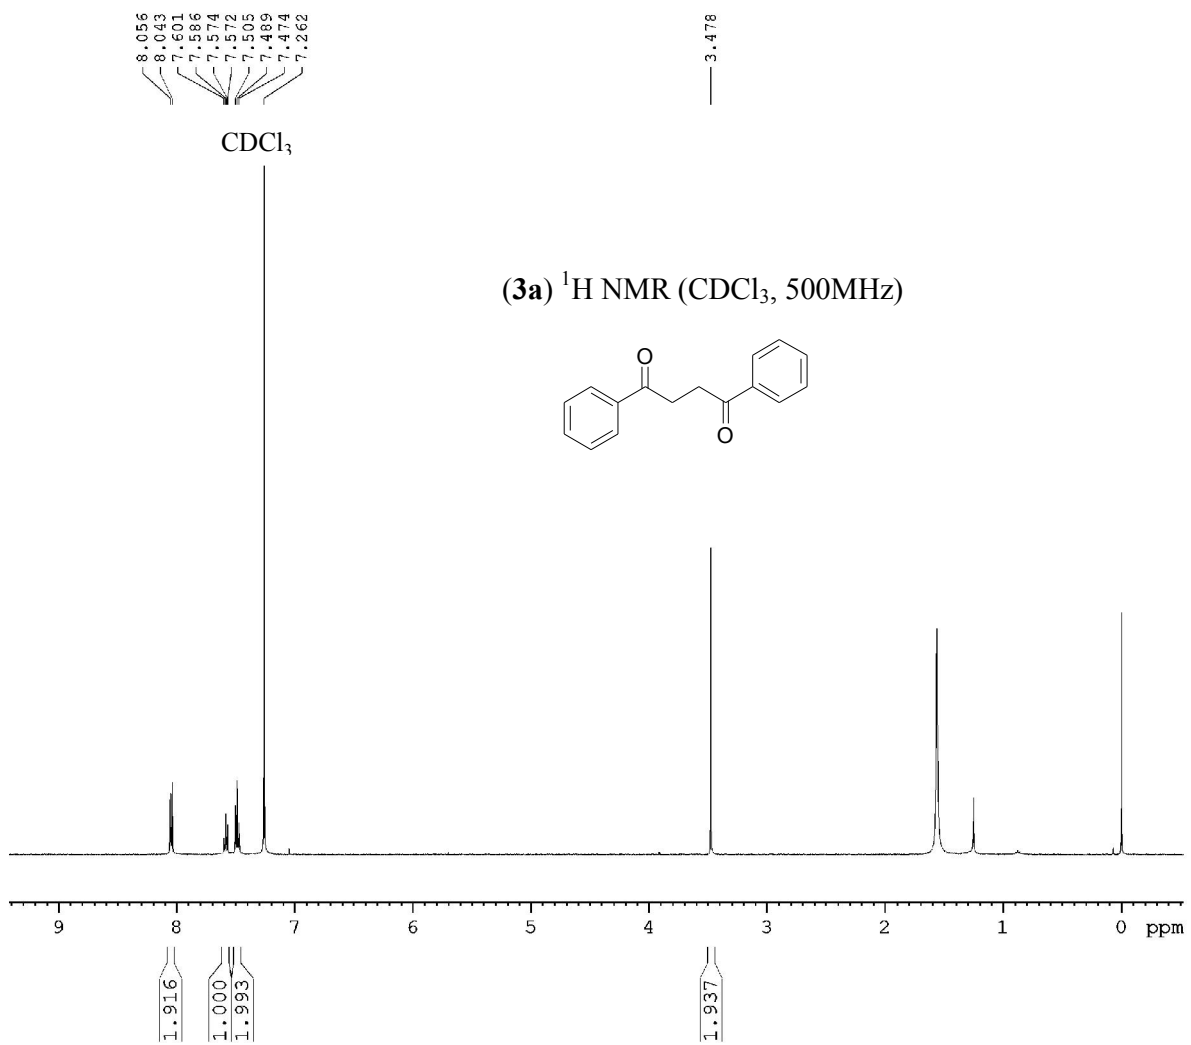

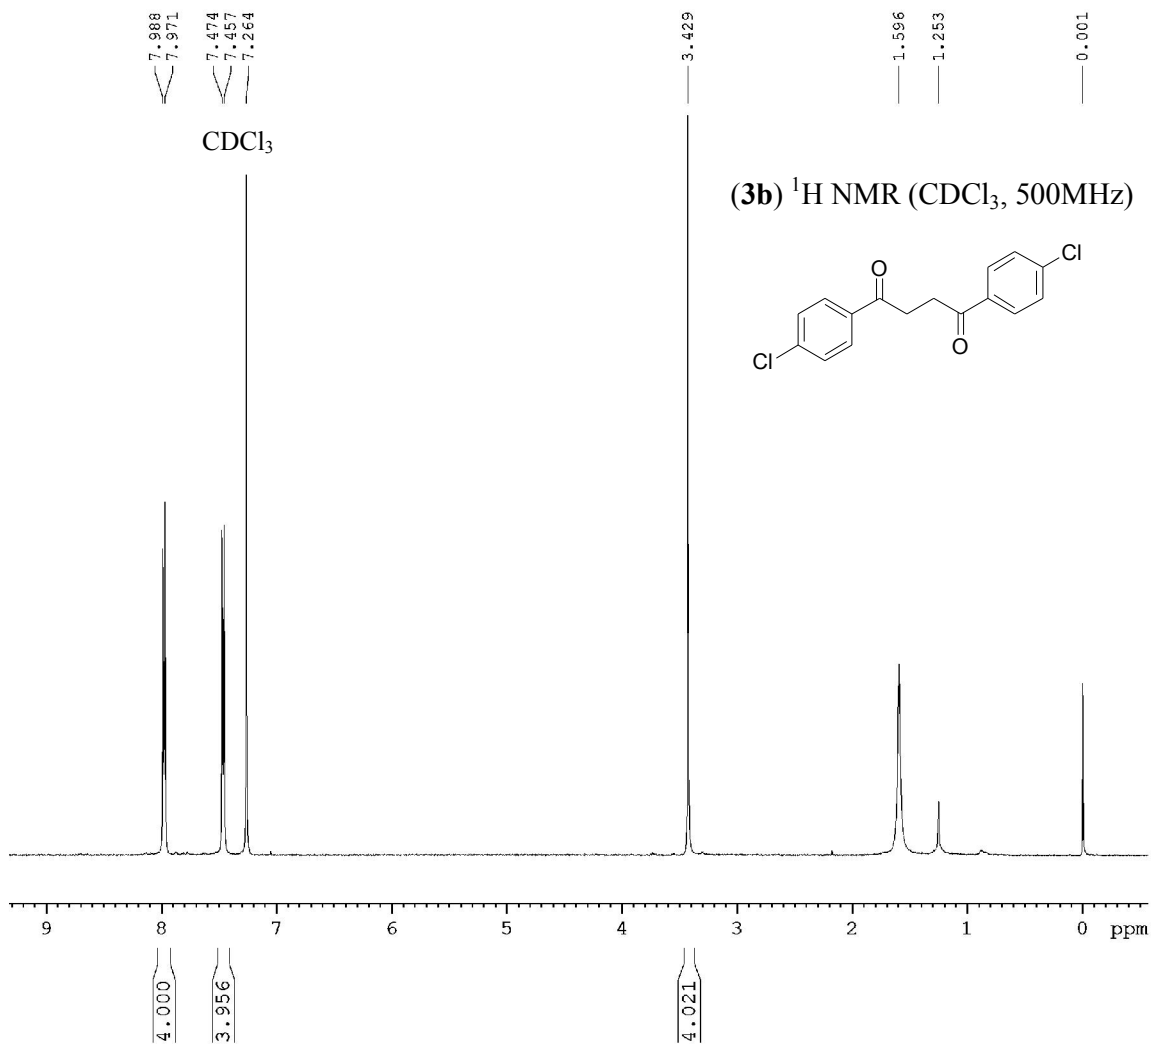

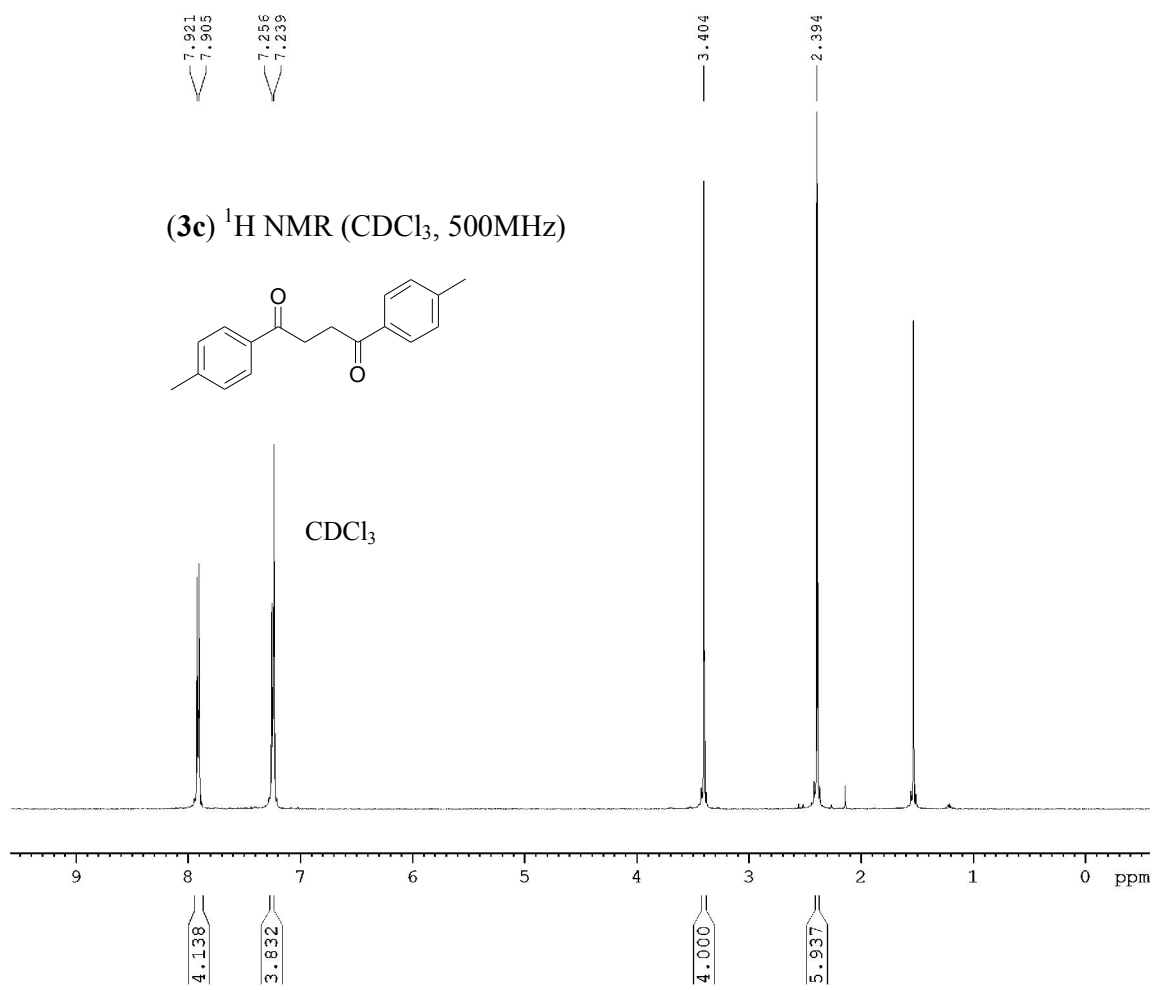

(3d)  $^1\text{H}$  NMR ( $\text{CDCl}_3$ , 500MHz)

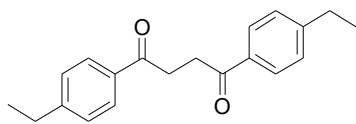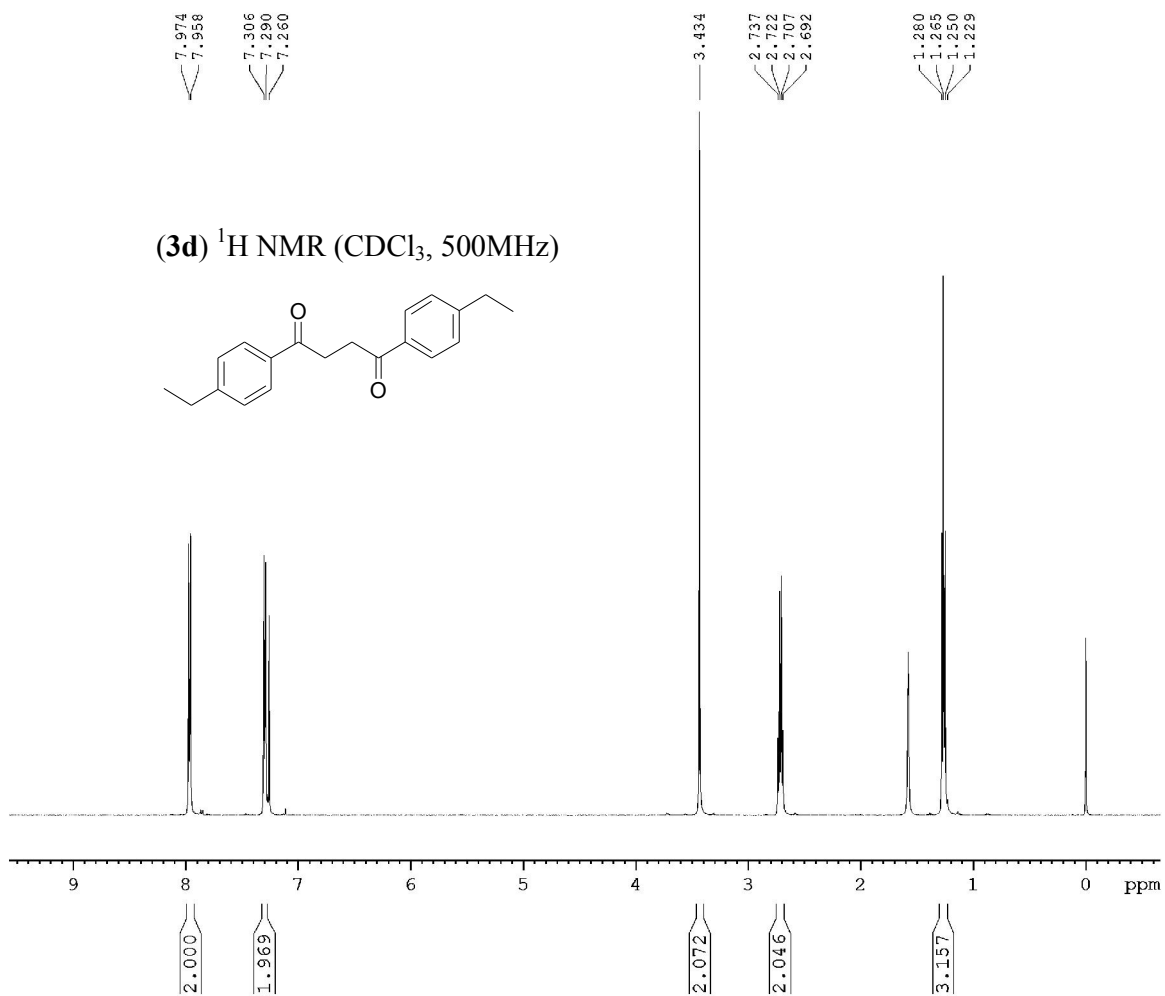

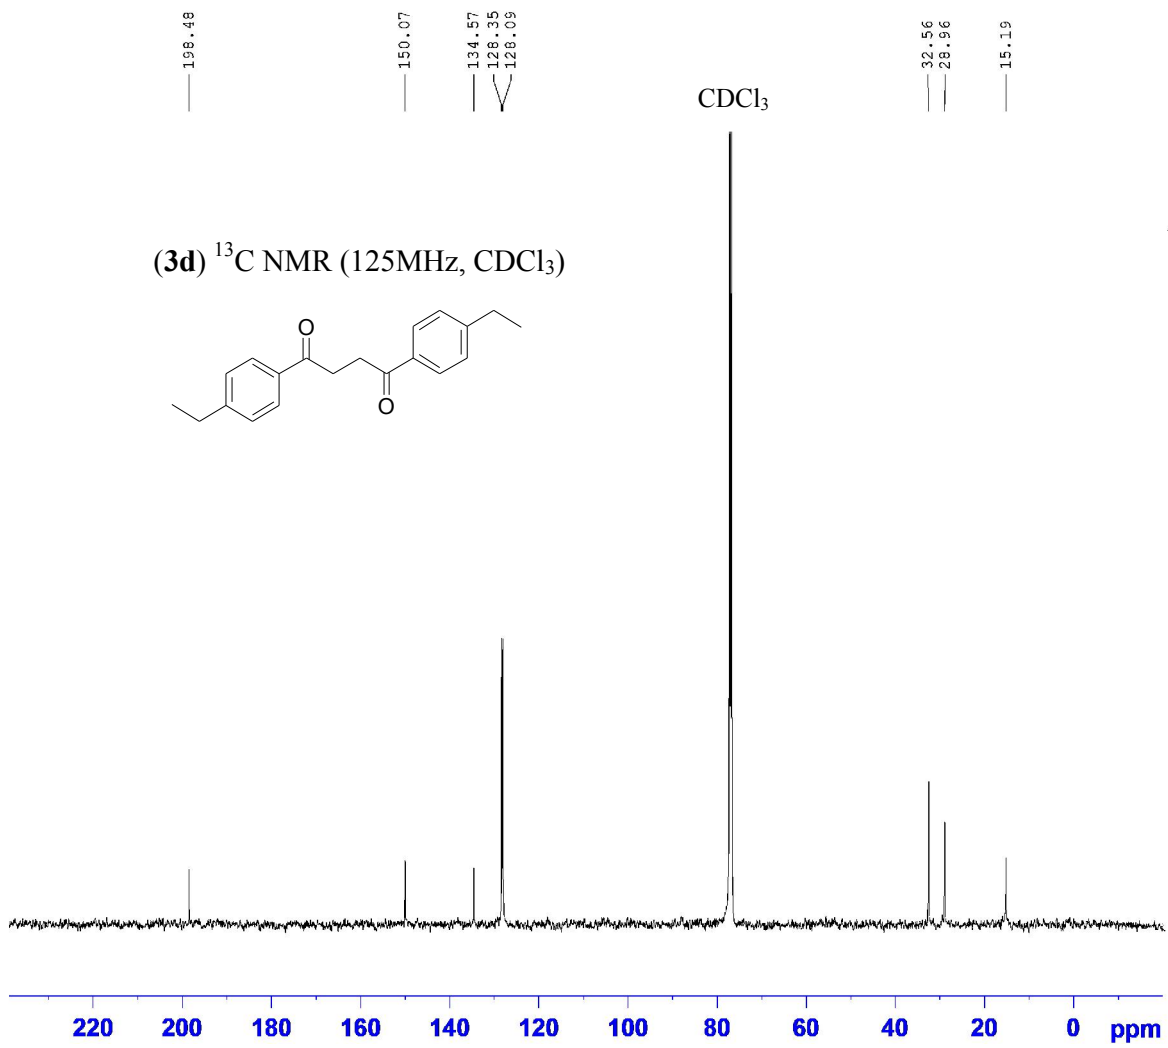

7.806  
7.782  
7.766  
7.259  
7.231  
7.215

(3e) <sup>1</sup>H NMR (CDCl<sub>3</sub>, 500MHz)

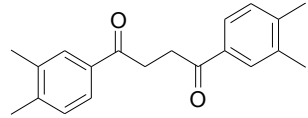

3.416

2.350  
2.322

1.609

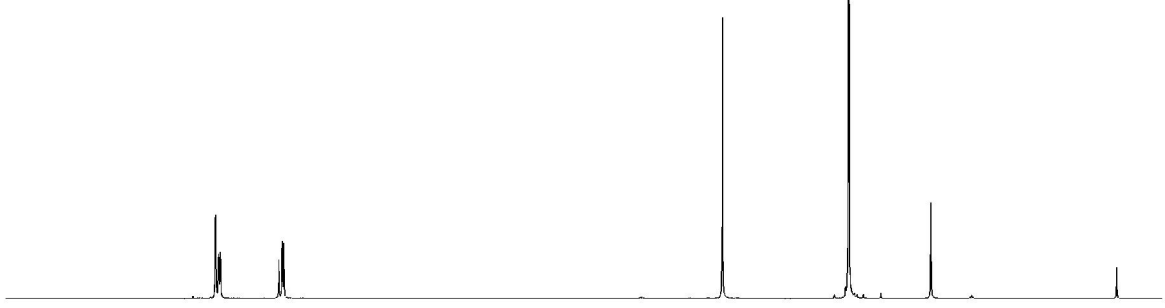

9.0 8.5 8.0 7.5 7.0 6.5 6.0 5.5 5.0 4.5 4.0 3.5 3.0 2.5 2.0 1.5 1.0 0.5 ppm

0.926  
1.000

0.951

1.979

5.893

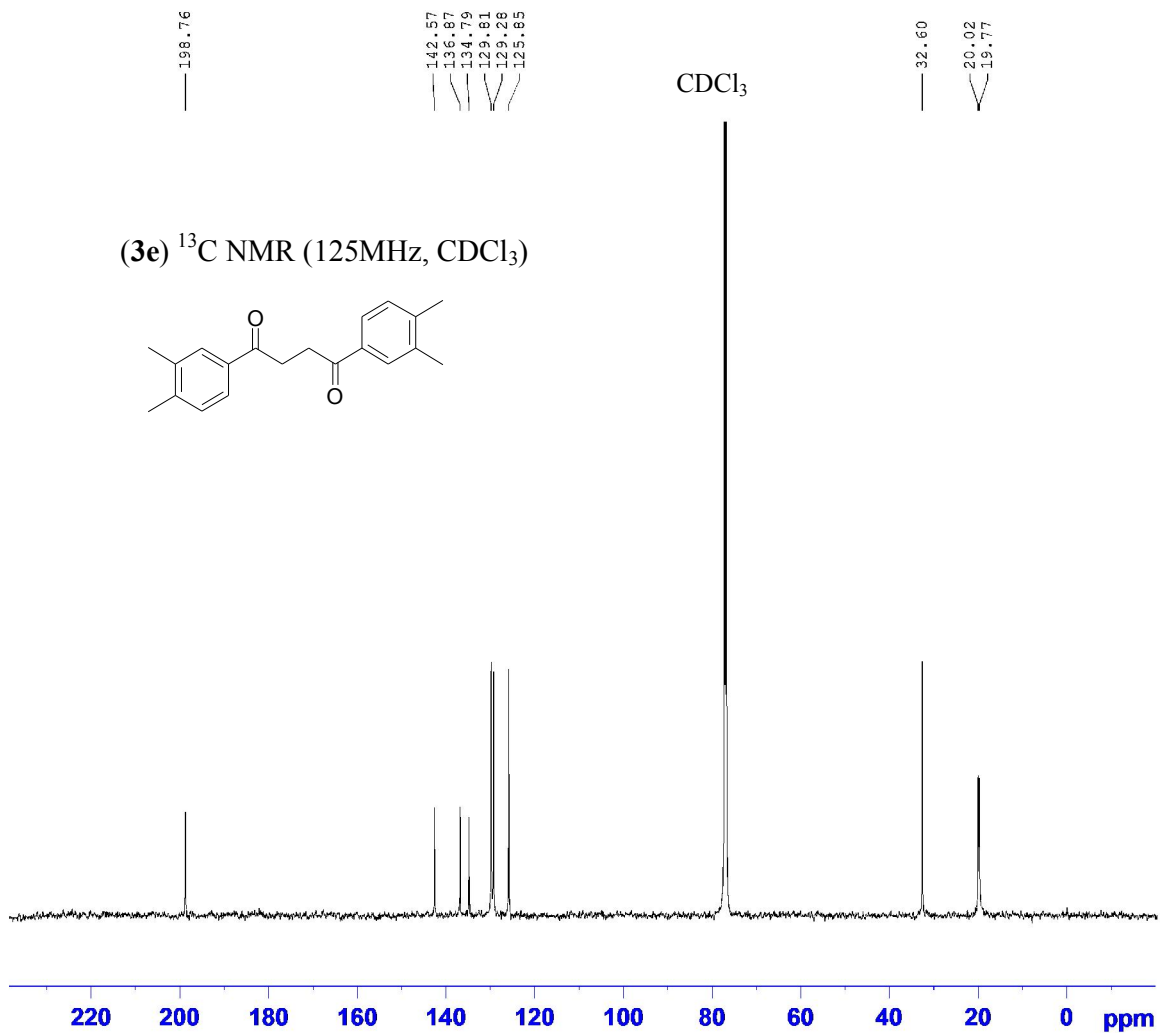



(4a) <sup>1</sup>H NMR (CDCl<sub>3</sub>, 500MHz)

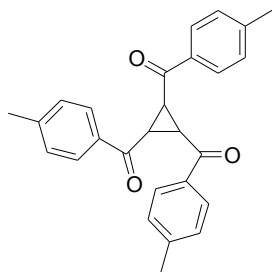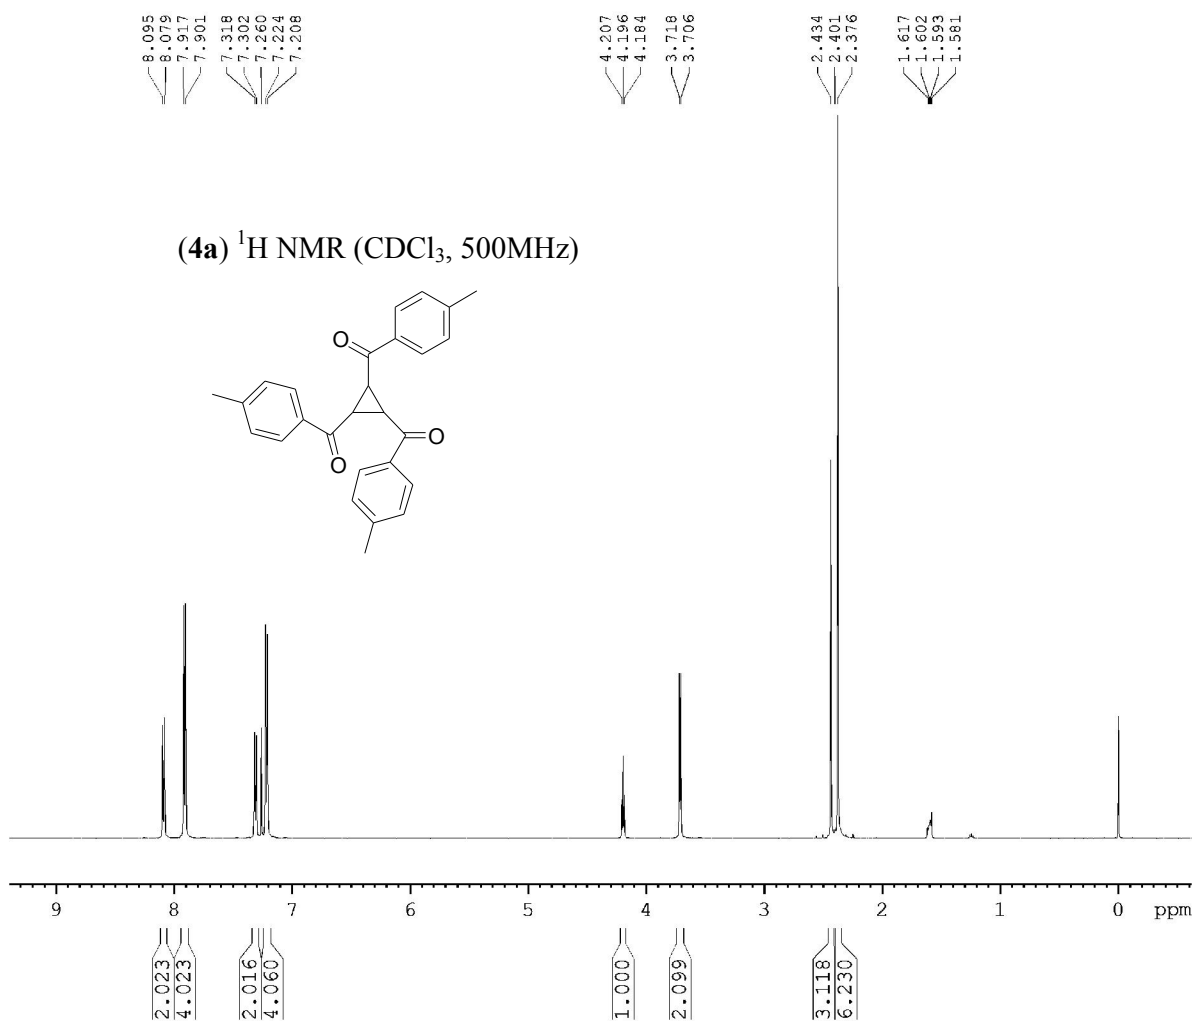

(4a)  $^{13}\text{C}$  NMR (125MHz,  $\text{CDCl}_3$ )

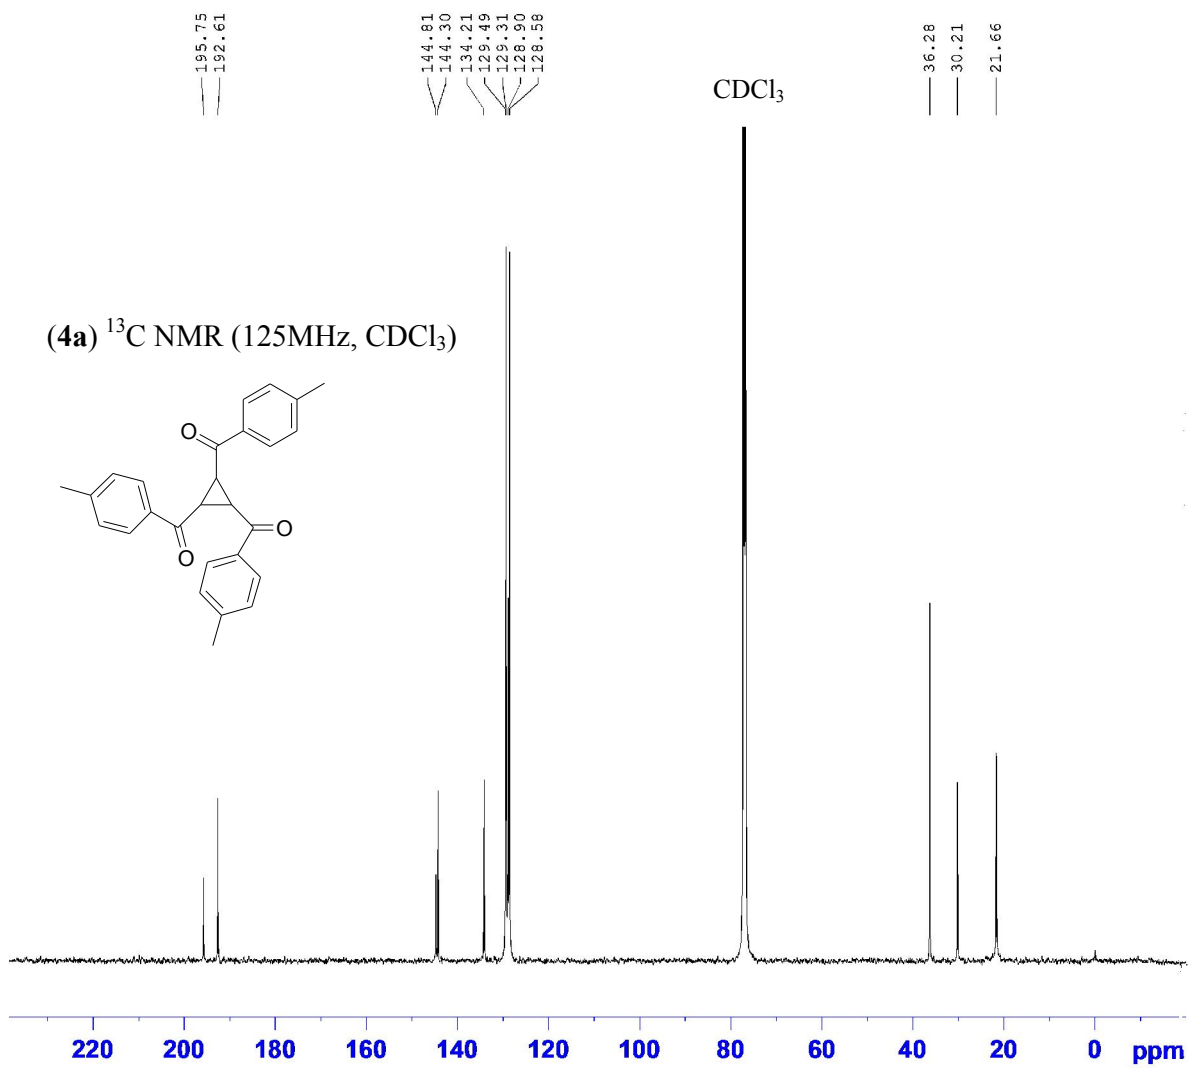

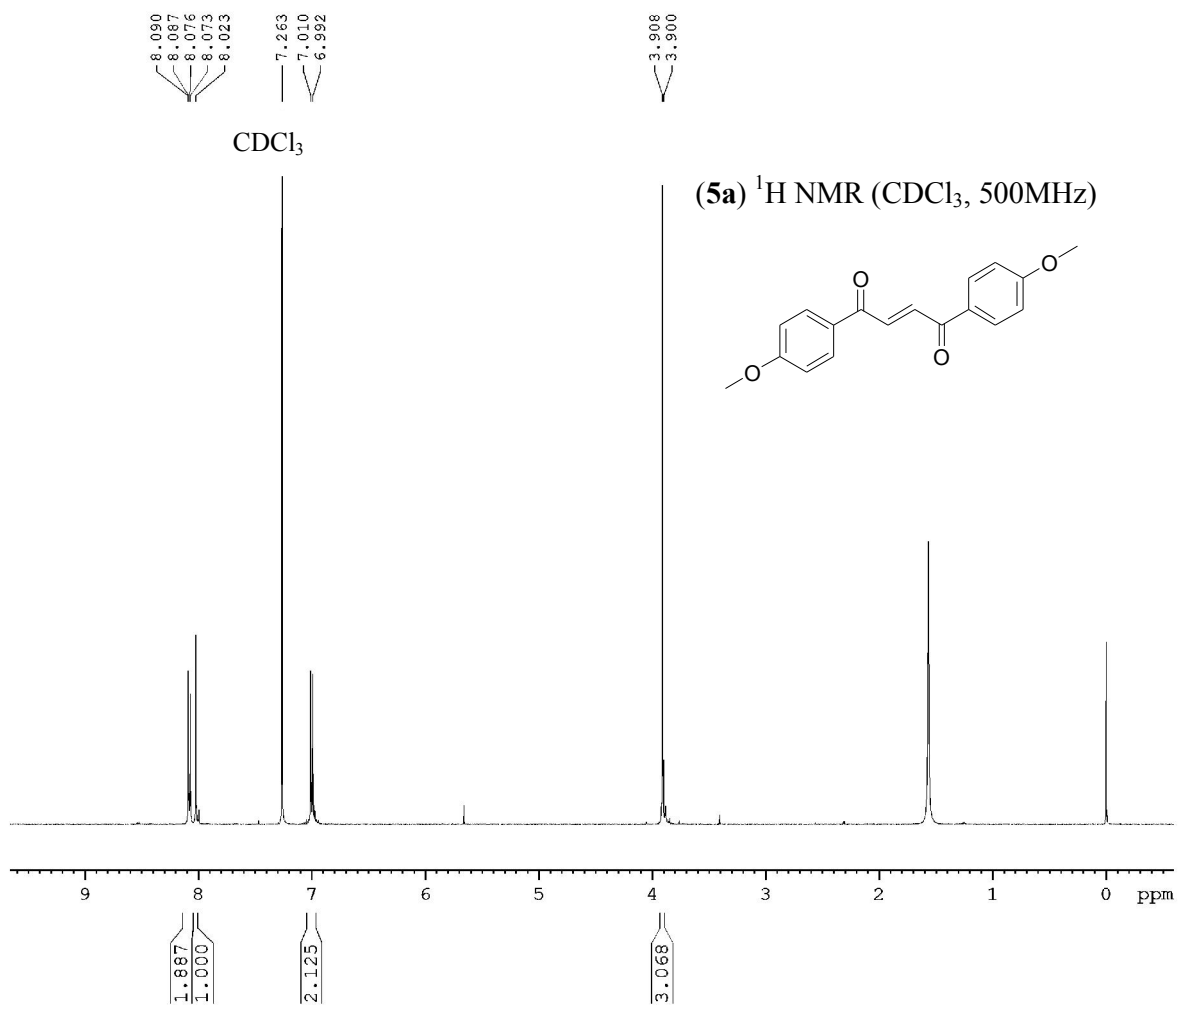

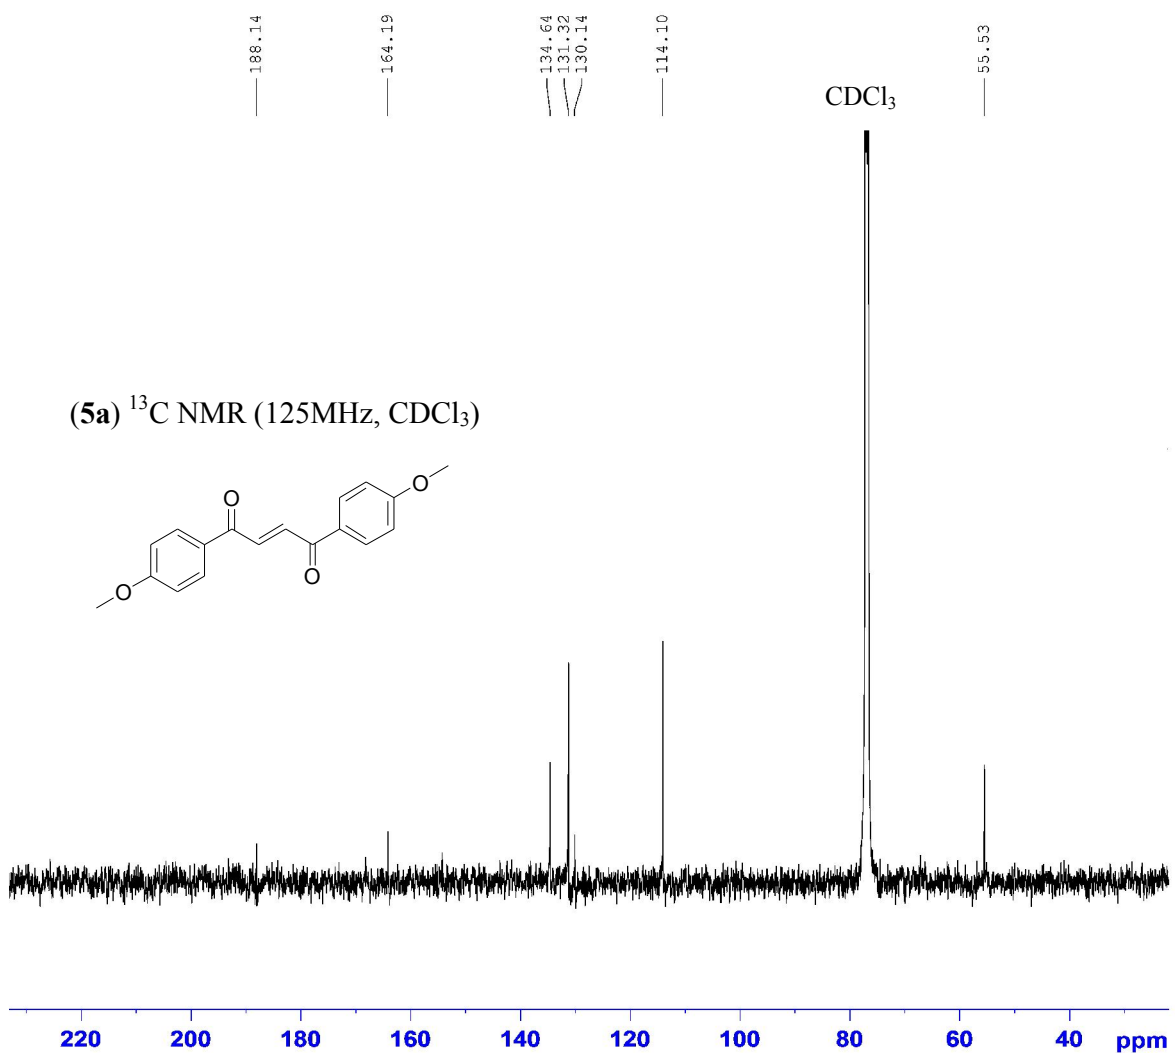

Supplement: c5ra26604a1.pdf [file c5ra26604a1.pdf]
